# Supplementary material for: Study on the thermal reactions of [60]fullerene with amino acids and amino acid esters
Source: Royal Society of Chemistry journal article supplement (doi:10.1039/c2ob26066b), 2012-01-01
Supplement: c2ob26066b.pdf [file c2ob26066b.pdf]

## Electronic Supplementary information

### Thermal Reactions of [60]Fullerene with Amino Acids and Amino Acid Esters: Mechanistic Insight

San-E Zhu,<sup>a</sup> Xin Cheng,<sup>a</sup> Yu-Jin Li,<sup>a</sup> Cheng-Kang Mai,<sup>a</sup> Yong-Shun Huang,<sup>a</sup>  
Guan-Wu Wang,<sup>\*a,b</sup> Ru-Fang Peng,<sup>b</sup> Bo Jin,<sup>b</sup> and Shi-Jin Chu<sup>b</sup>

<sup>a</sup> CAS Key Laboratory of Soft Matter Chemistry, Hefei National Laboratory for Physical Sciences at Microscale, and Department of Chemistry, University of Science and Technology of China, Hefei, Anhui 230026, P. R. China.

Fax: (+86)551-360-7864; E-mail: gwang@ustc.edu.cn

<sup>b</sup> State Key Laboratory Cultivation Base for Nonmetal Composites and Functional Materials, Southwest University of Science and Technology, Mianyang, Sichuan 621010, P. R. China

#### Table of Contents

|                                                                 |     |
|-----------------------------------------------------------------|-----|
| <sup>1</sup> H NMR spectrum of product <b>2a</b>                | S2  |
| <sup>1</sup> H NMR spectrum of product <b>2b</b>                | S3  |
| <sup>1</sup> H NMR spectrum of product <b>2c</b>                | S4  |
| <sup>1</sup> H NMR spectrum of product <b>2d</b>                | S5  |
| <sup>1</sup> H NMR spectrum of product <b>4a</b>                | S6  |
| <sup>1</sup> H NMR spectrum of product <b>4b</b>                | S7  |
| <sup>1</sup> H NMR spectrum of product <b>4c</b>                | S8  |
| <sup>13</sup> C NMR spectrum of product <b>4c</b>               | S9  |
| <sup>1</sup> H NMR spectrum of product <b>4d</b>                | S10 |
| <sup>13</sup> C NMR spectrum of product <b>4d</b>               | S11 |
| <sup>1</sup> H NMR spectrum of product <b>5b</b>                | S12 |
| <sup>13</sup> C NMR spectrum of product <b>5b</b>               | S13 |
| <sup>1</sup> H NMR spectrum of product <b>5c</b>                | S14 |
| <sup>13</sup> C NMR spectrum of product <b>5c</b>               | S15 |
| <sup>1</sup> H NMR spectrum of product <b>7a</b>                | S16 |
| <sup>1</sup> H NMR spectrum of product <b>7b</b>                | S17 |
| <sup>13</sup> C NMR spectrum of product <b>7b</b>               | S18 |
| <sup>1</sup> H NMR spectrum of product <b>7c</b>                | S19 |
| <sup>13</sup> C NMR spectrum of product <b>7c</b>               | S20 |
| <sup>1</sup> H NMR spectrum of product <b>7d</b>                | S21 |
| <sup>13</sup> C NMR spectrum of product <b>7d</b>               | S22 |
| <sup>1</sup> H NMR spectrum of product <b>8a</b>                | S23 |
| <sup>1</sup> H NMR spectrum of product <b>8b</b>                | S24 |
| <sup>13</sup> C NMR spectrum of product <b>8b</b>               | S25 |
| <sup>1</sup> H NMR spectrum of product <b>8c</b>                | S26 |
| <sup>13</sup> C NMR spectrum of product <b>8c</b>               | S27 |
| <sup>1</sup> H NMR spectrum of product <i>cis</i> - <b>9</b>    | S28 |
| <sup>1</sup> H NMR spectrum of product <i>trans</i> - <b>9</b>  | S29 |
| <sup>13</sup> C NMR spectrum of product <i>trans</i> - <b>9</b> | S30 |
| <sup>1</sup> H NMR spectrum of product <b>10c</b>               | S31 |

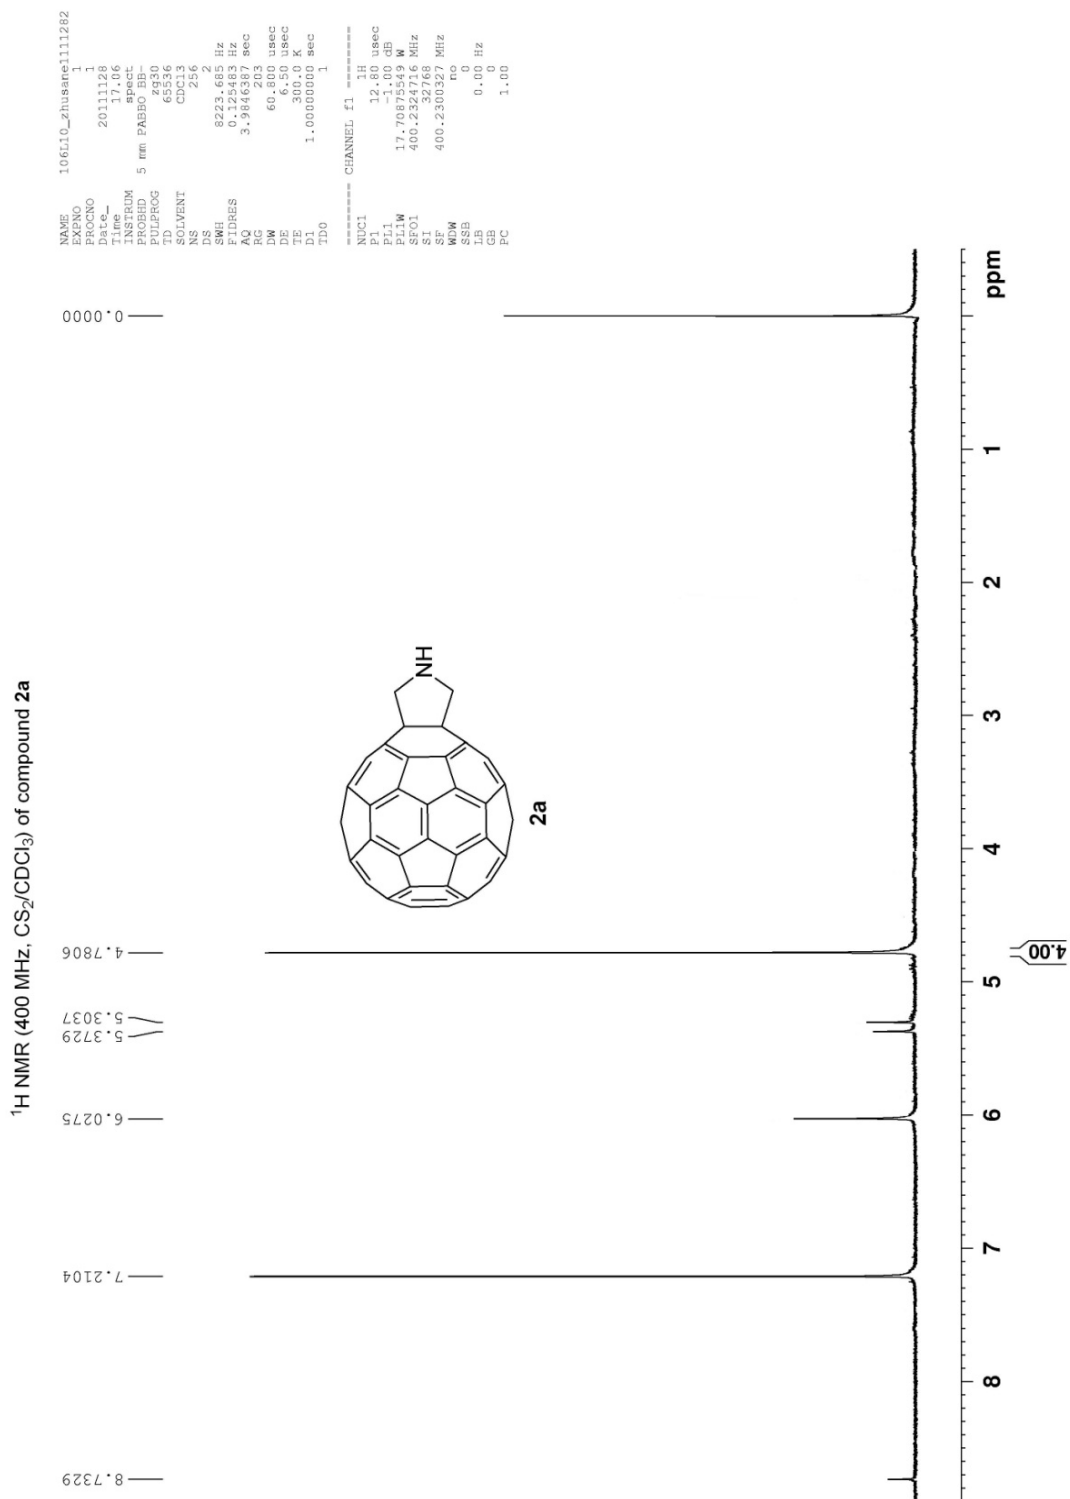

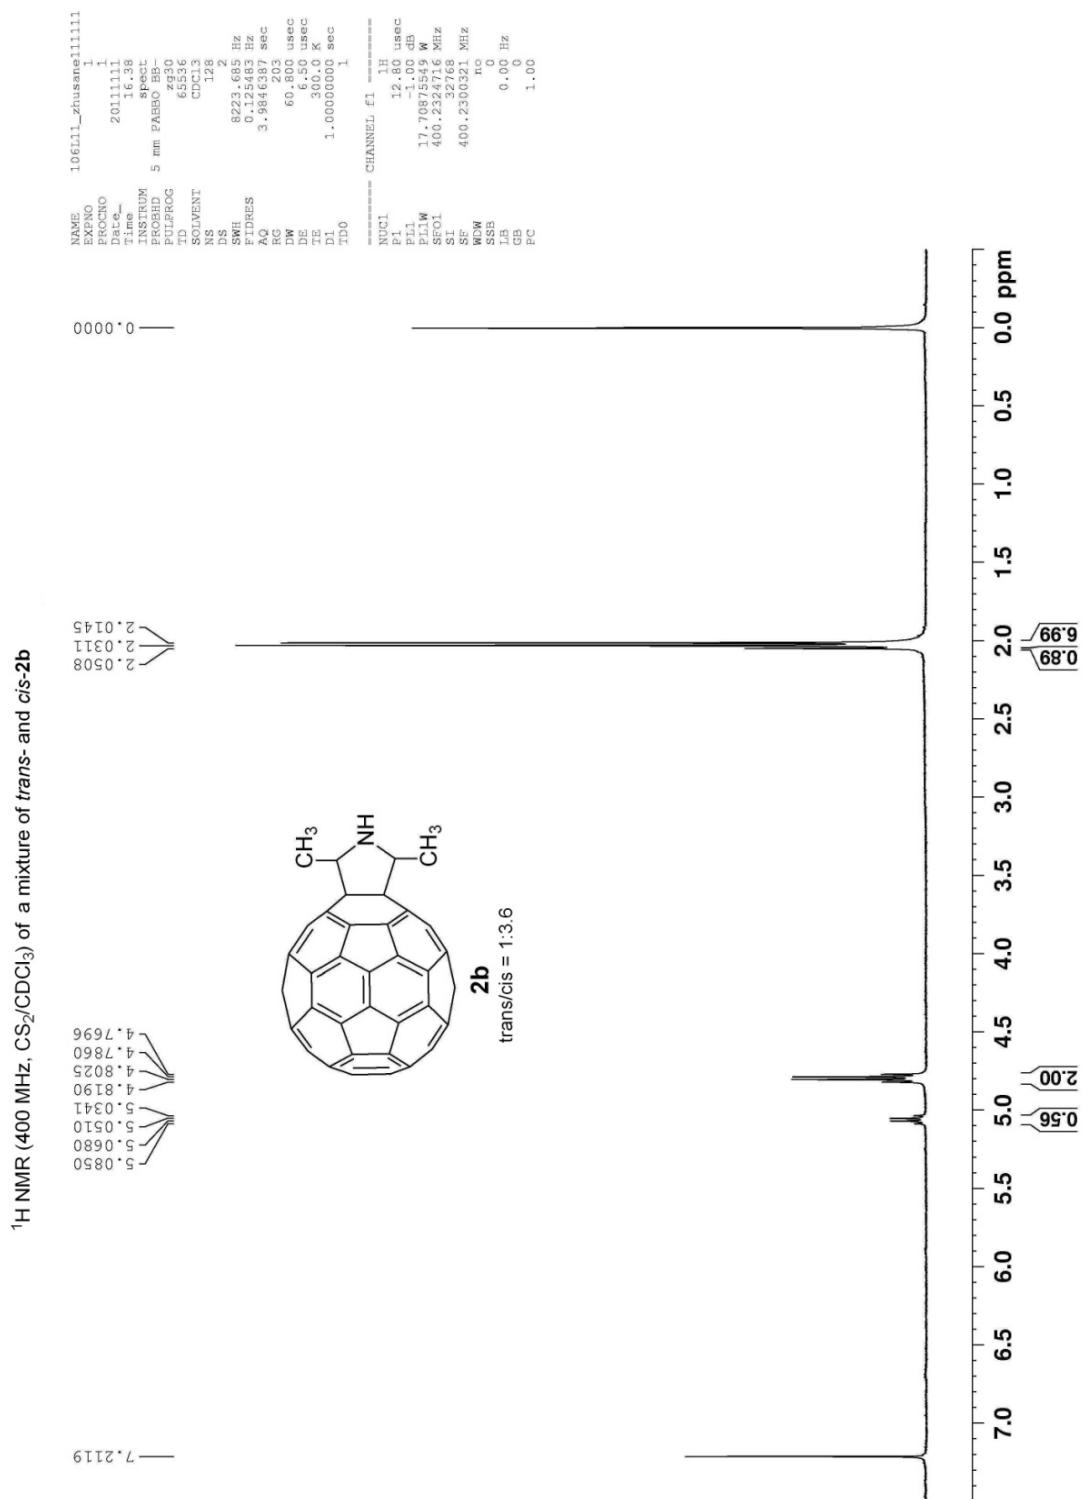



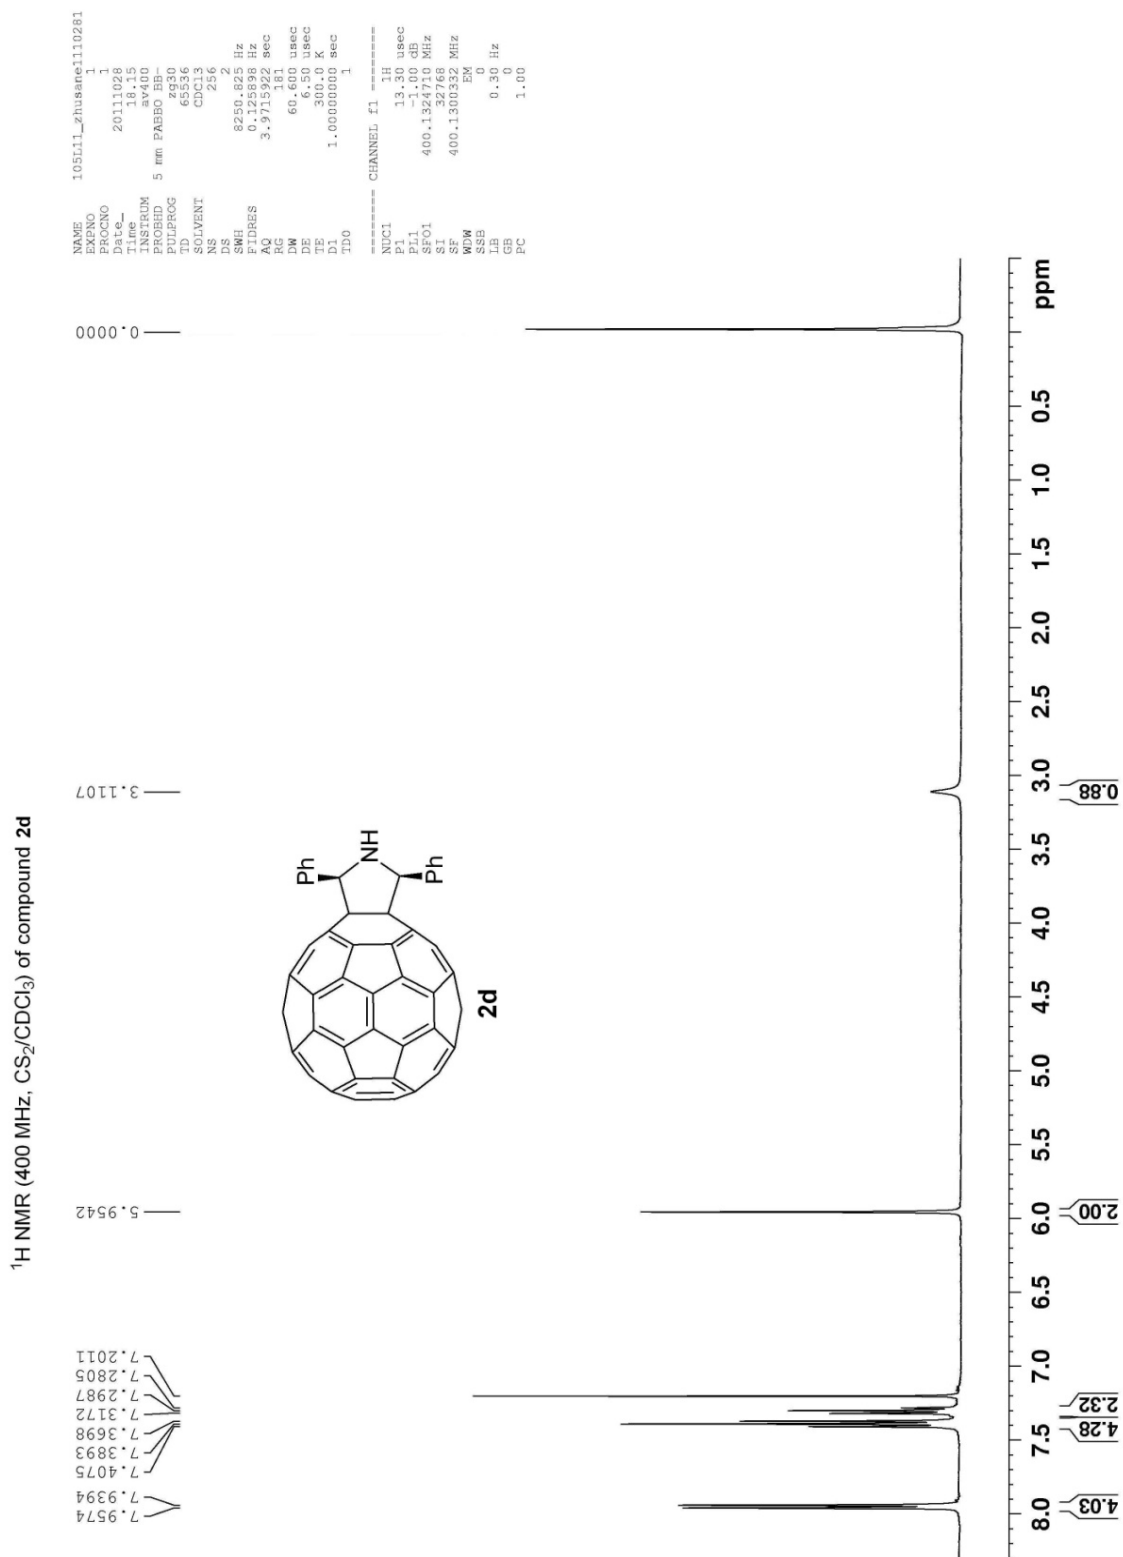

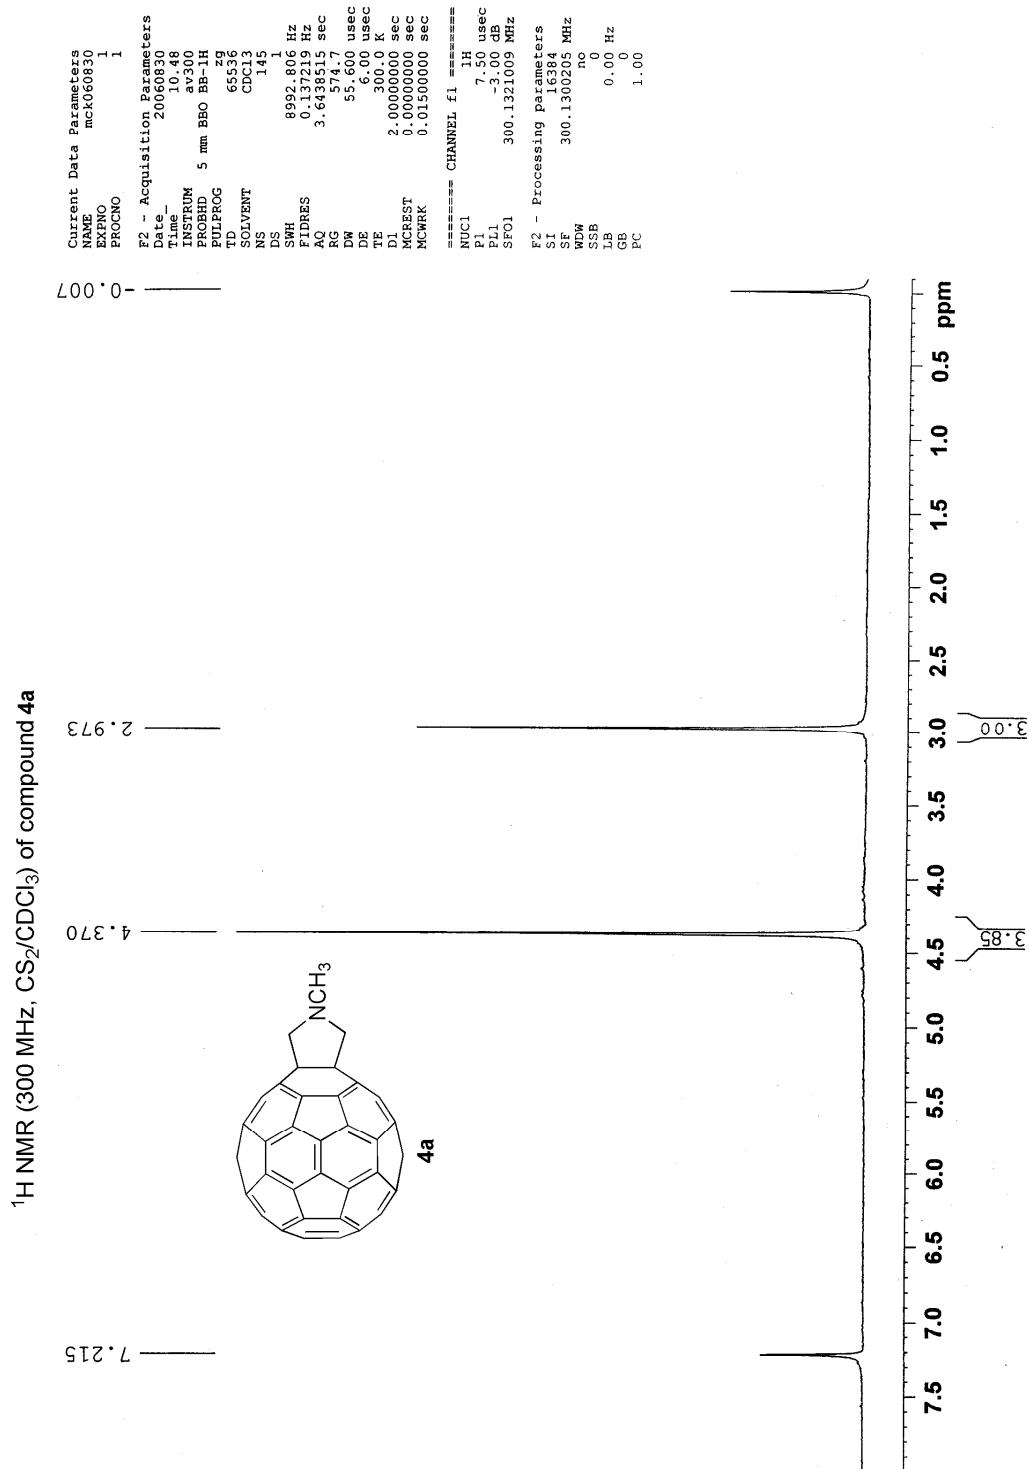

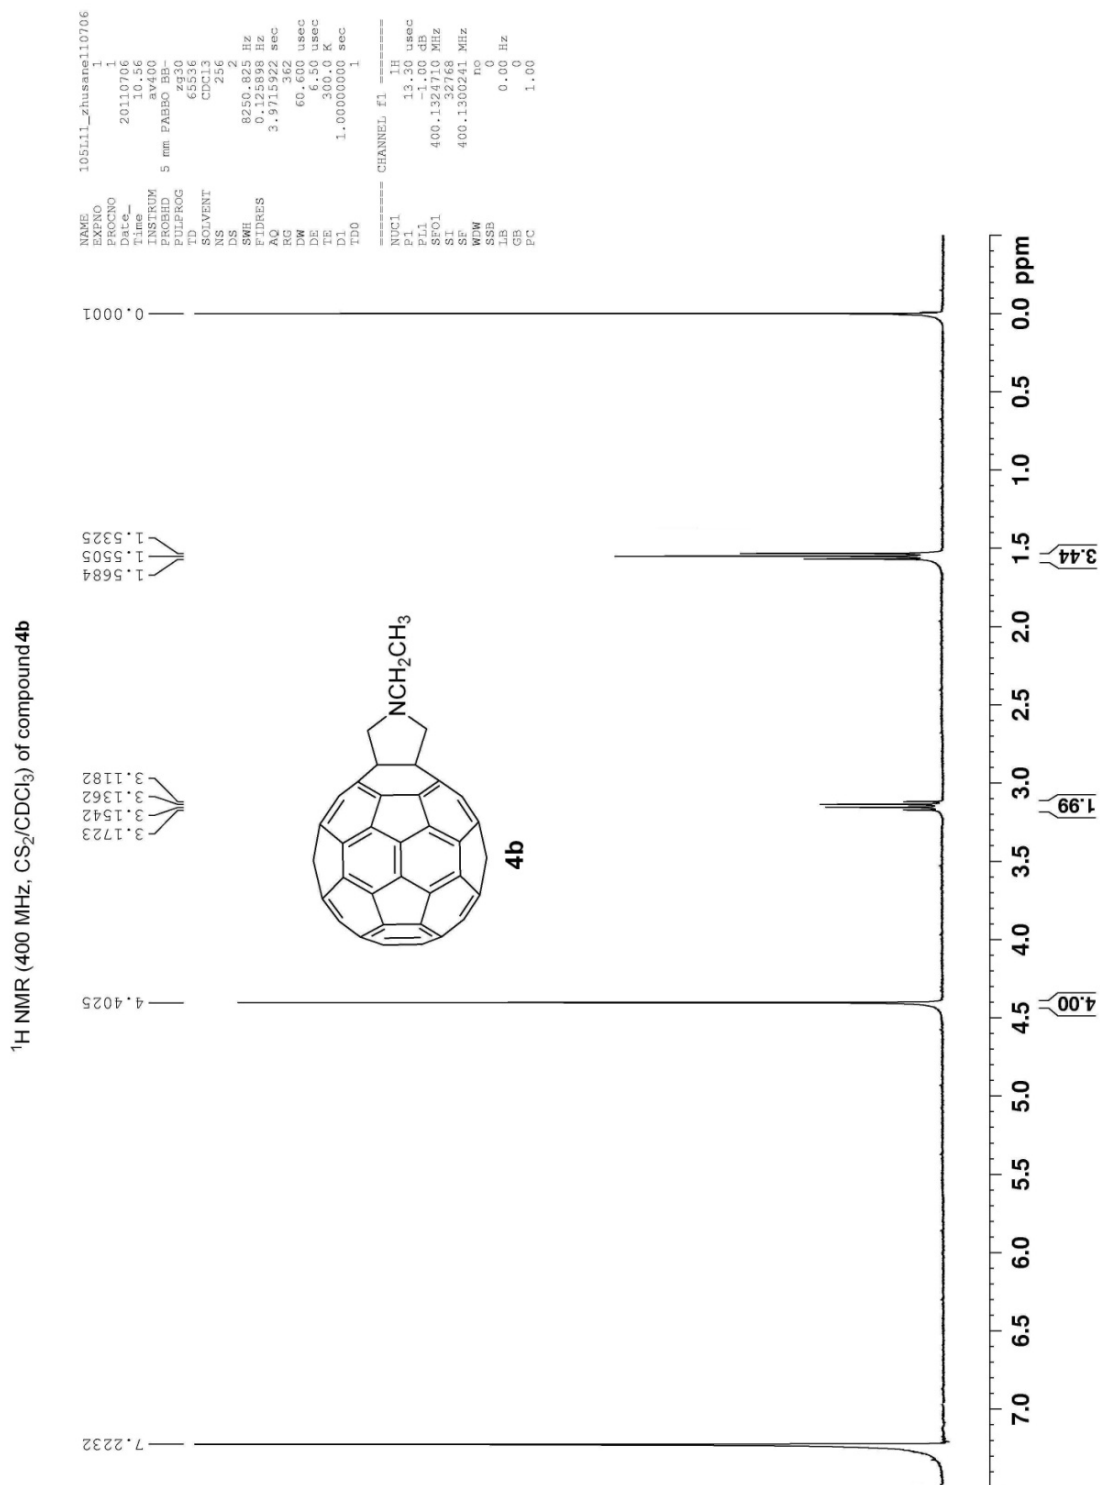

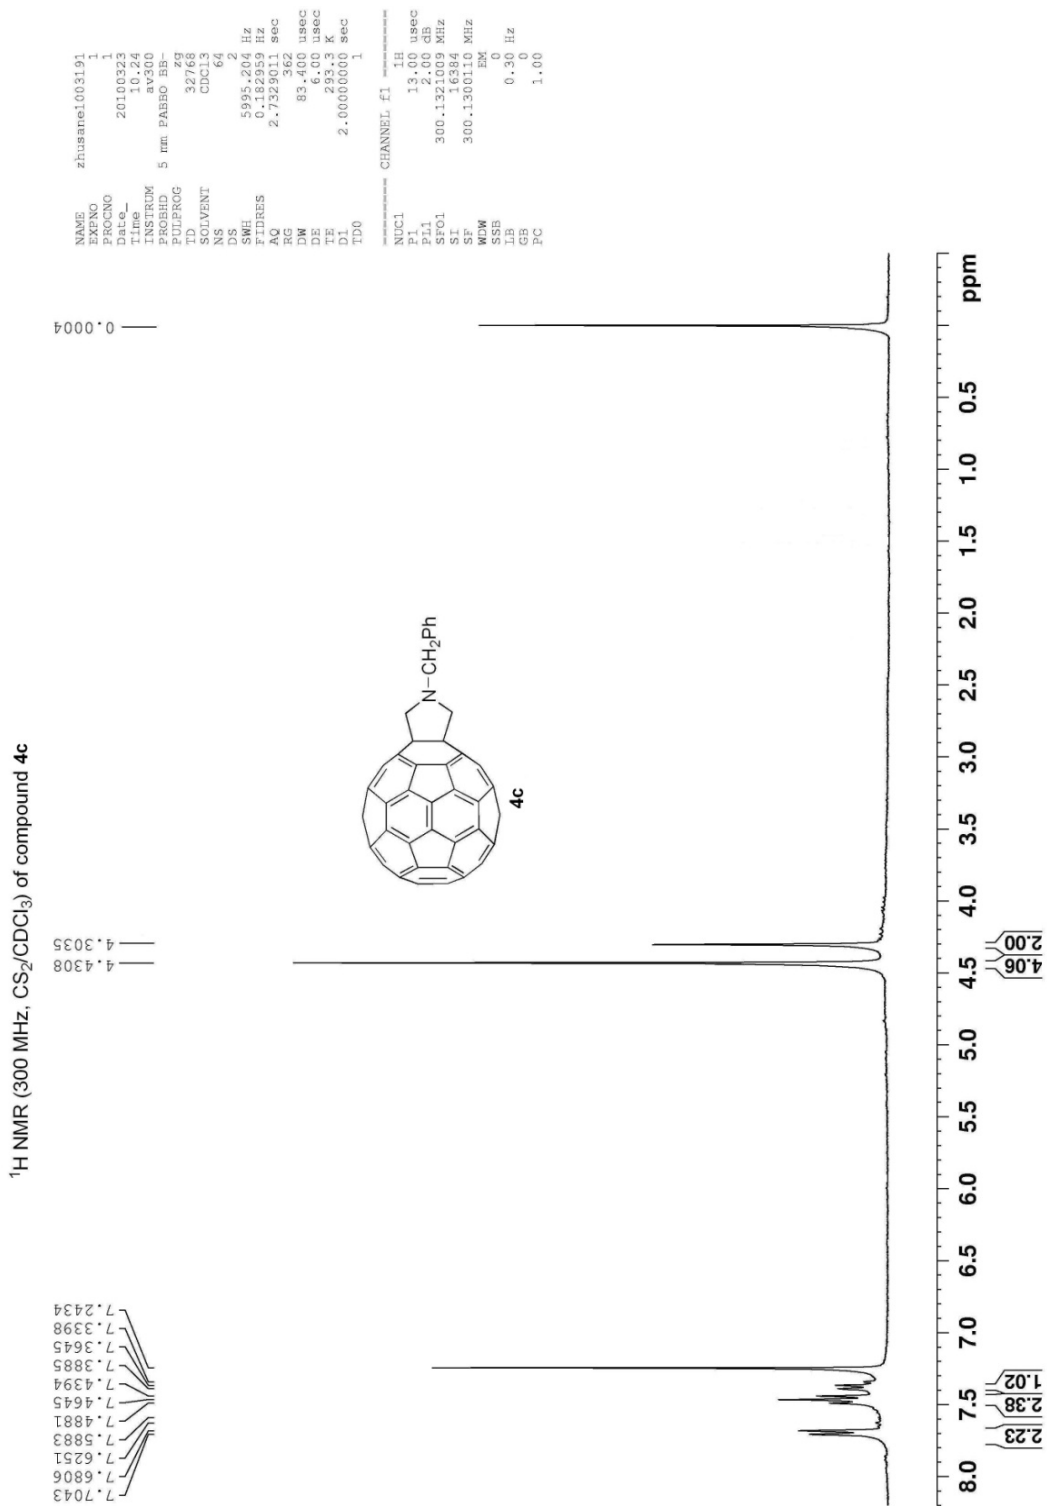



Electronic Supplementary Material (ESI) for Organic & Biomolecular Chemistry  
This journal is © The Royal Society of Chemistry 2012

<sup>13</sup>C NMR (75 MHz, CS<sub>2</sub>/CDCl<sub>3</sub>) of compound **4c**

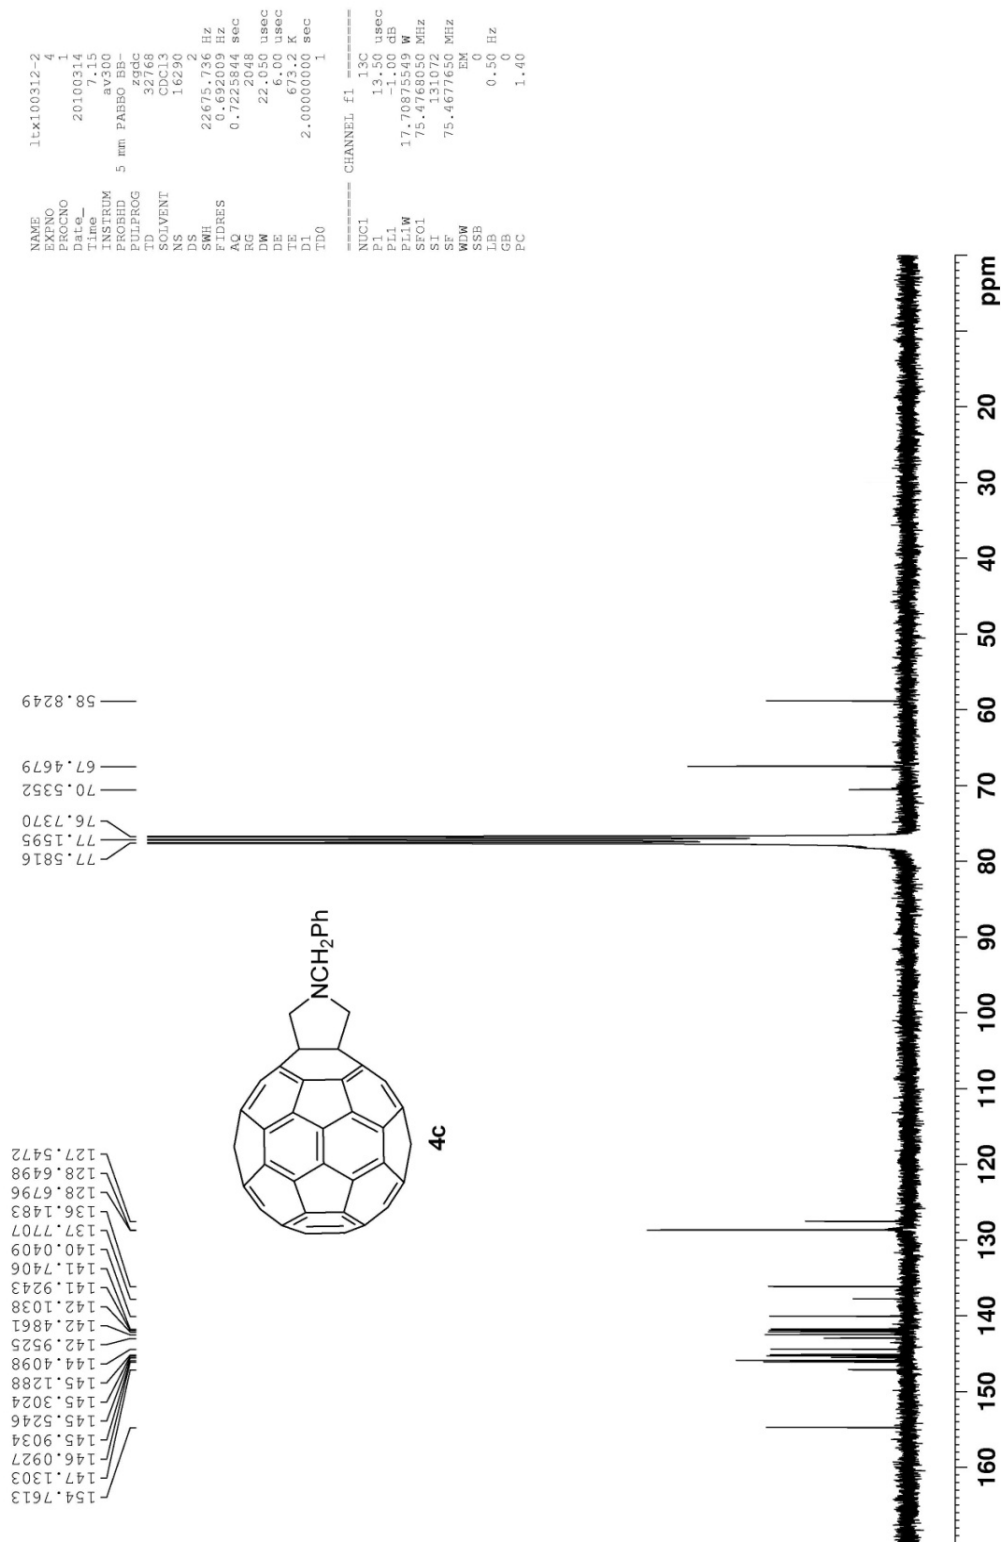

<sup>1</sup>H NMR (300 MHz, CS<sub>2</sub>/CDCl<sub>3</sub>) of compound **4d**

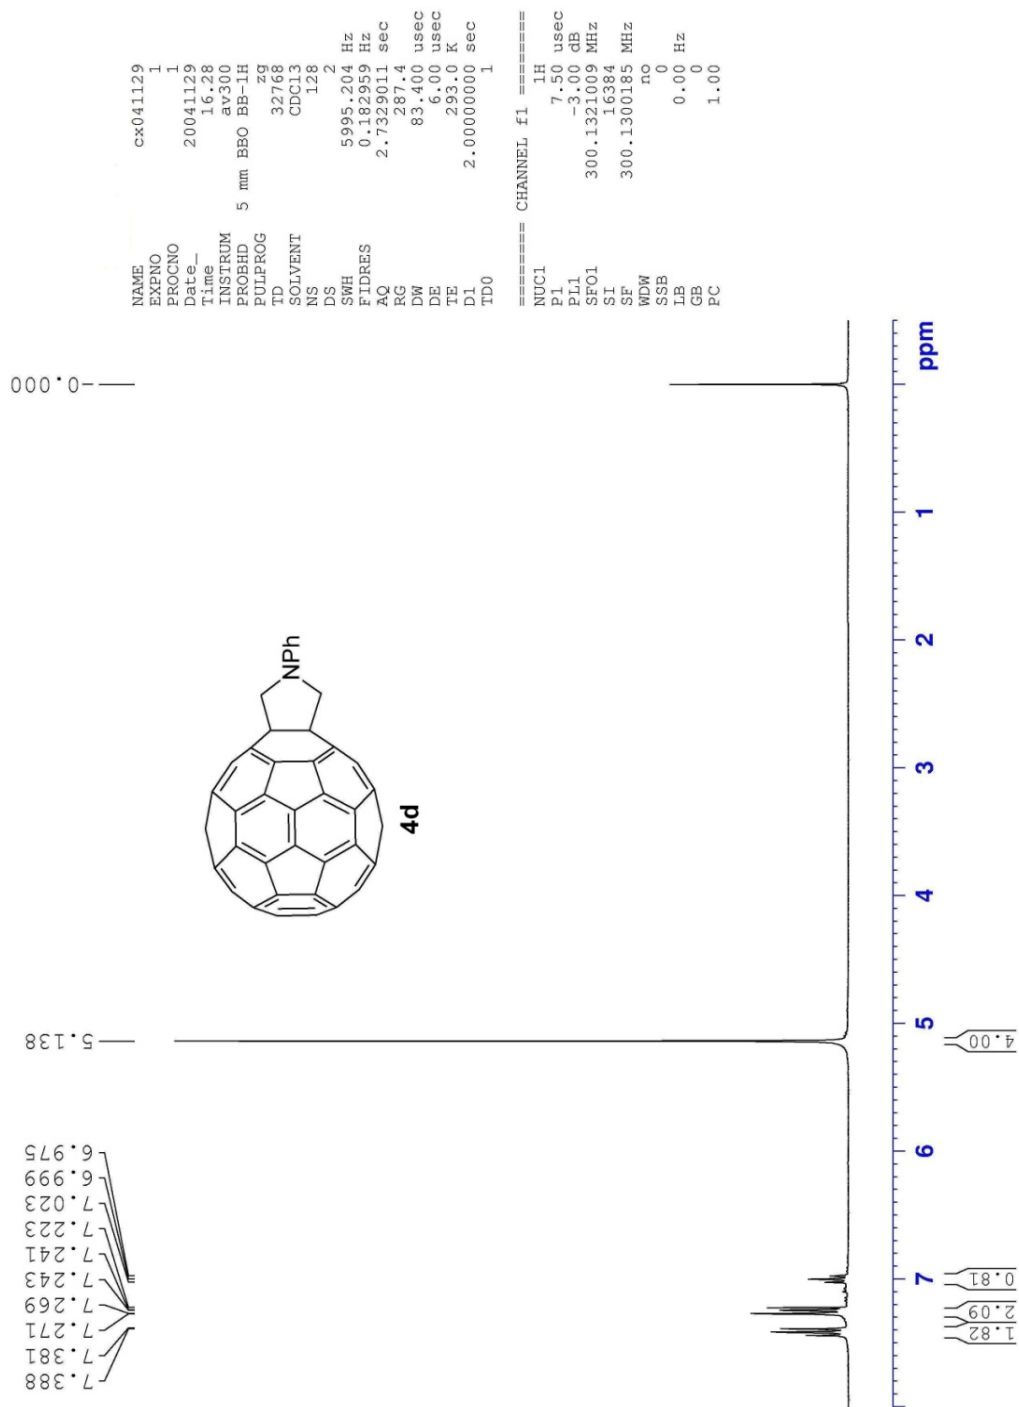

<sup>13</sup>C NMR (75 MHz, CS<sub>2</sub>/CDCl<sub>3</sub>) of compound 4d

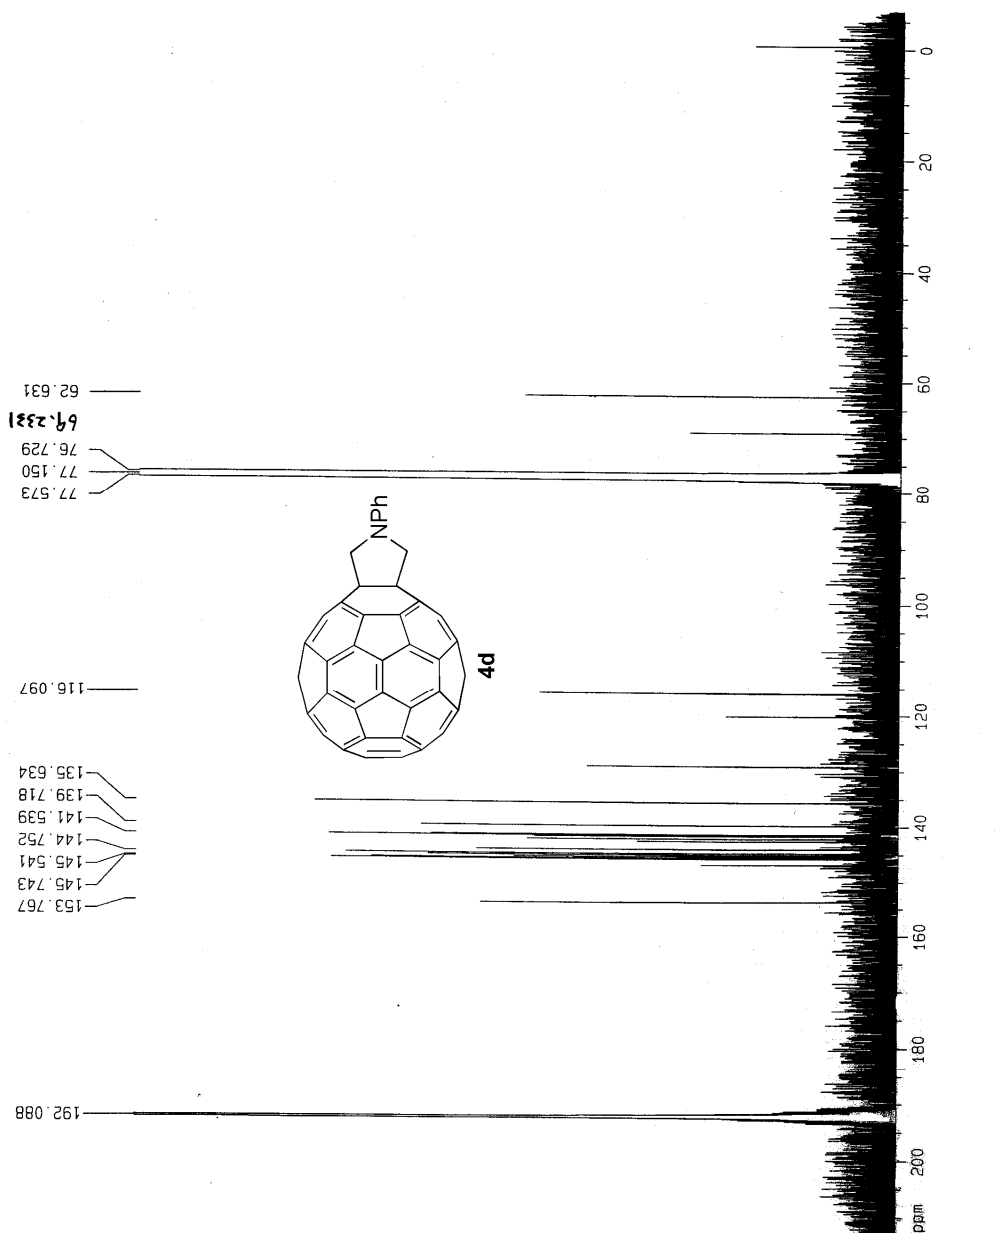

Current Data Parameters  
NAME c×041202c  
EXPNO 2  
PROCNO 2

F2 - Acquisition Parameters  
Date\_ 20041209  
Time 17.21  
INSTRUM av300  
PROBHD 5 mm BBO BB-1H  
PULPROG zgpg  
TD 65536  
SOLVENT CDCl3  
NS 13294  
DS 2  
SWH 16556.291 Hz  
FIDRES 0.252629 Hz  
AQ 1.9792372 sec  
RG 1290.2  
DM 30.200 usec  
DE 6.00 usec  
TE 293.2 K  
D1 2.0000000 sec  
d11 0.0300000 sec  
PCREST 0.0000000 sec  
MCNRK 0.0150000 sec

===== CHANNEL f1 =====  
NUC1 13C  
P1 2.40 usec  
PL1 -6.00 dB  
SF01 75.4755588 MHz

===== CHANNEL f2 =====  
CPDPRG2 waltz16  
NUC2 1H  
PCPD2 80.00 usec  
PL2 120.00 dB  
PL12 15.00 dB  
SF02 300.1315007 MHz

F2 - Processing parameters  
SI 16384  
SF 75.4677956 MHz  
WDW EM  
SSB 0  
LB 0.30 Hz  
GB 0  
PC 4.00

1D NMR plot parameters  
CX 22.00 cm  
CY 3000.00 cm  
F1P 212.560 ppm  
F1 16041.43 Hz  
F2P -6.822 ppm  
F2 -514.86 Hz  
PPMCH 9.97192 ppm/cm  
HZCM 752.55872 Hz/cm

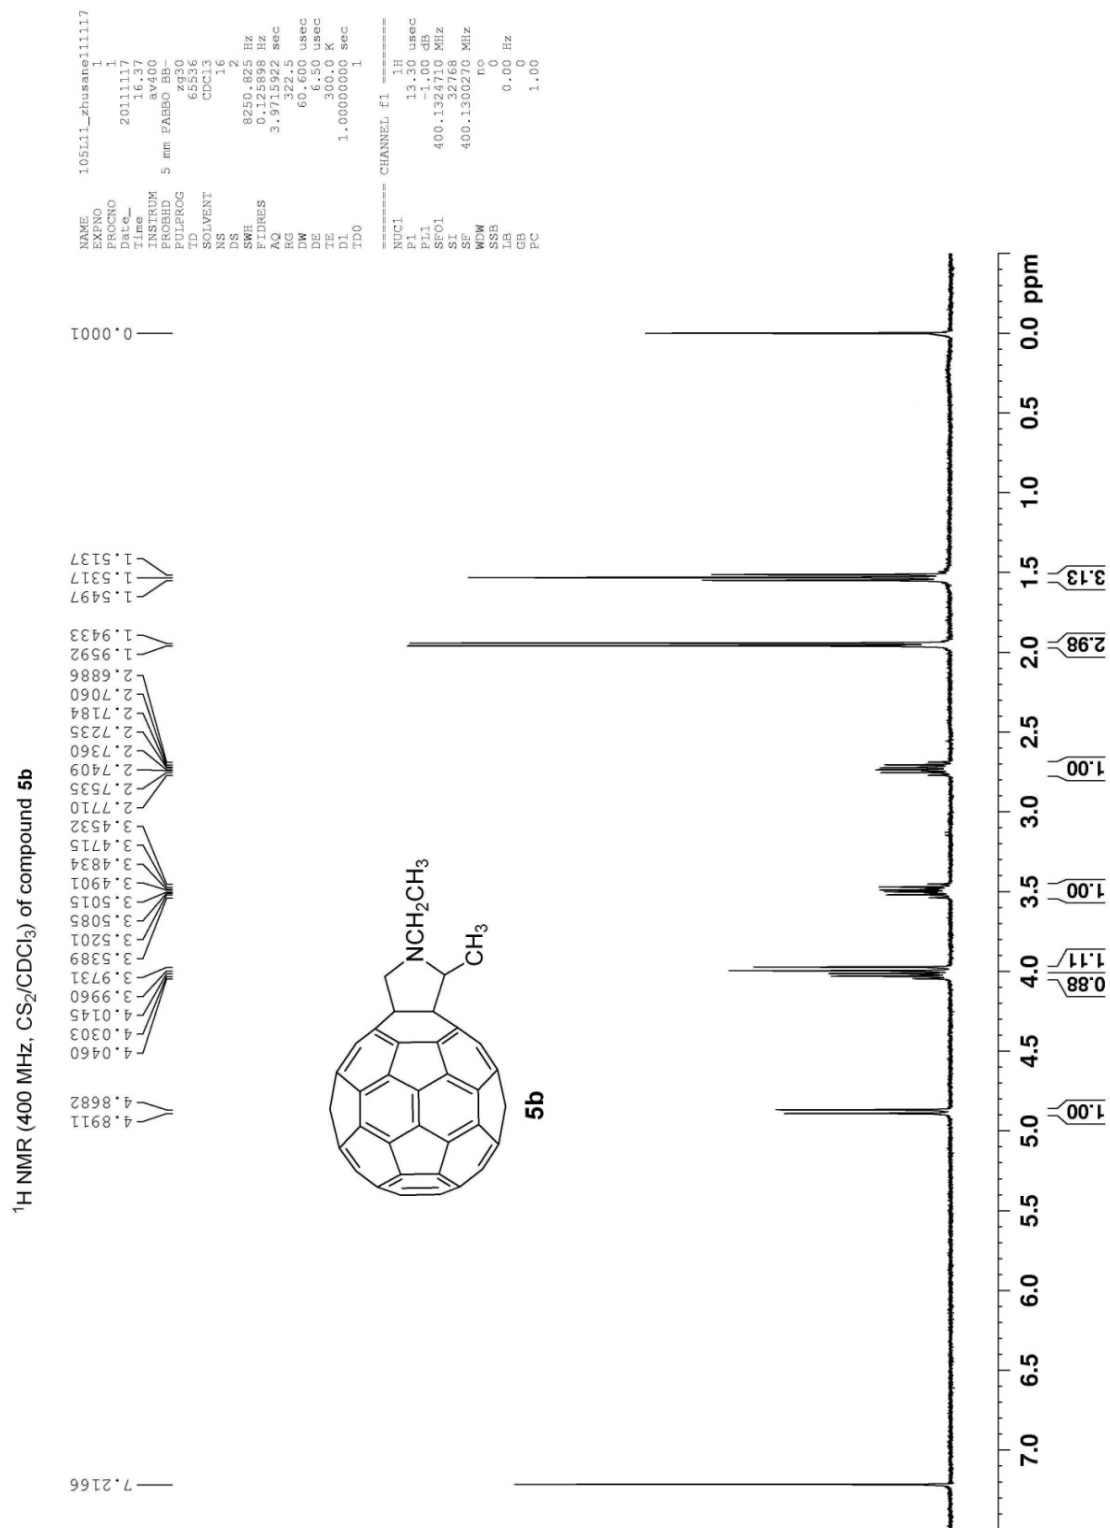

Electronic Supplementary Material (ESI) for Organic & Biomolecular Chemistry  
This journal is © The Royal Society of Chemistry 2012

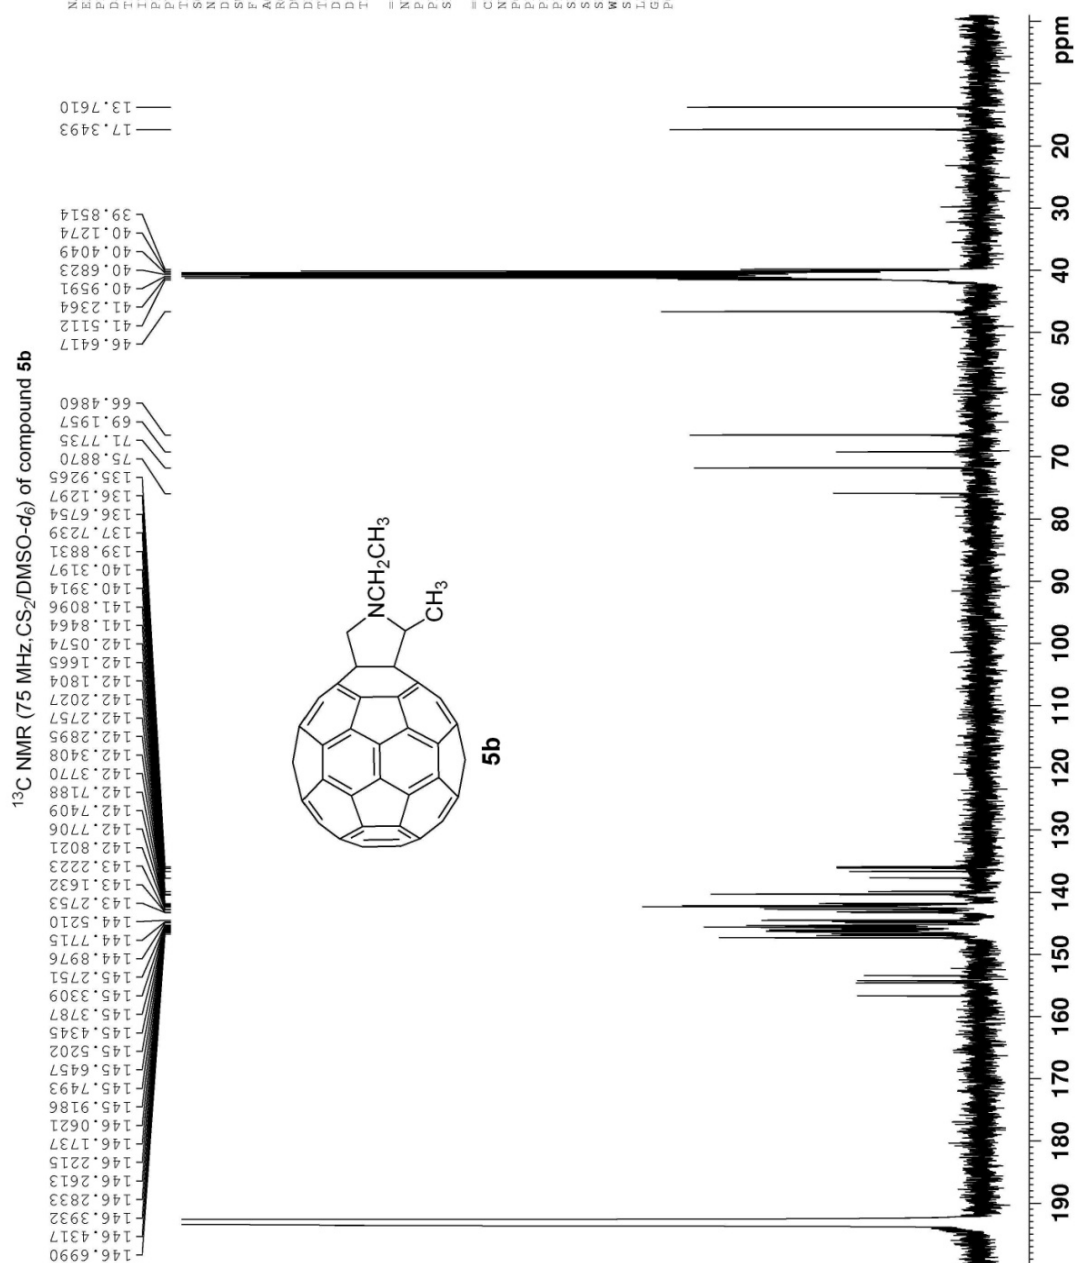

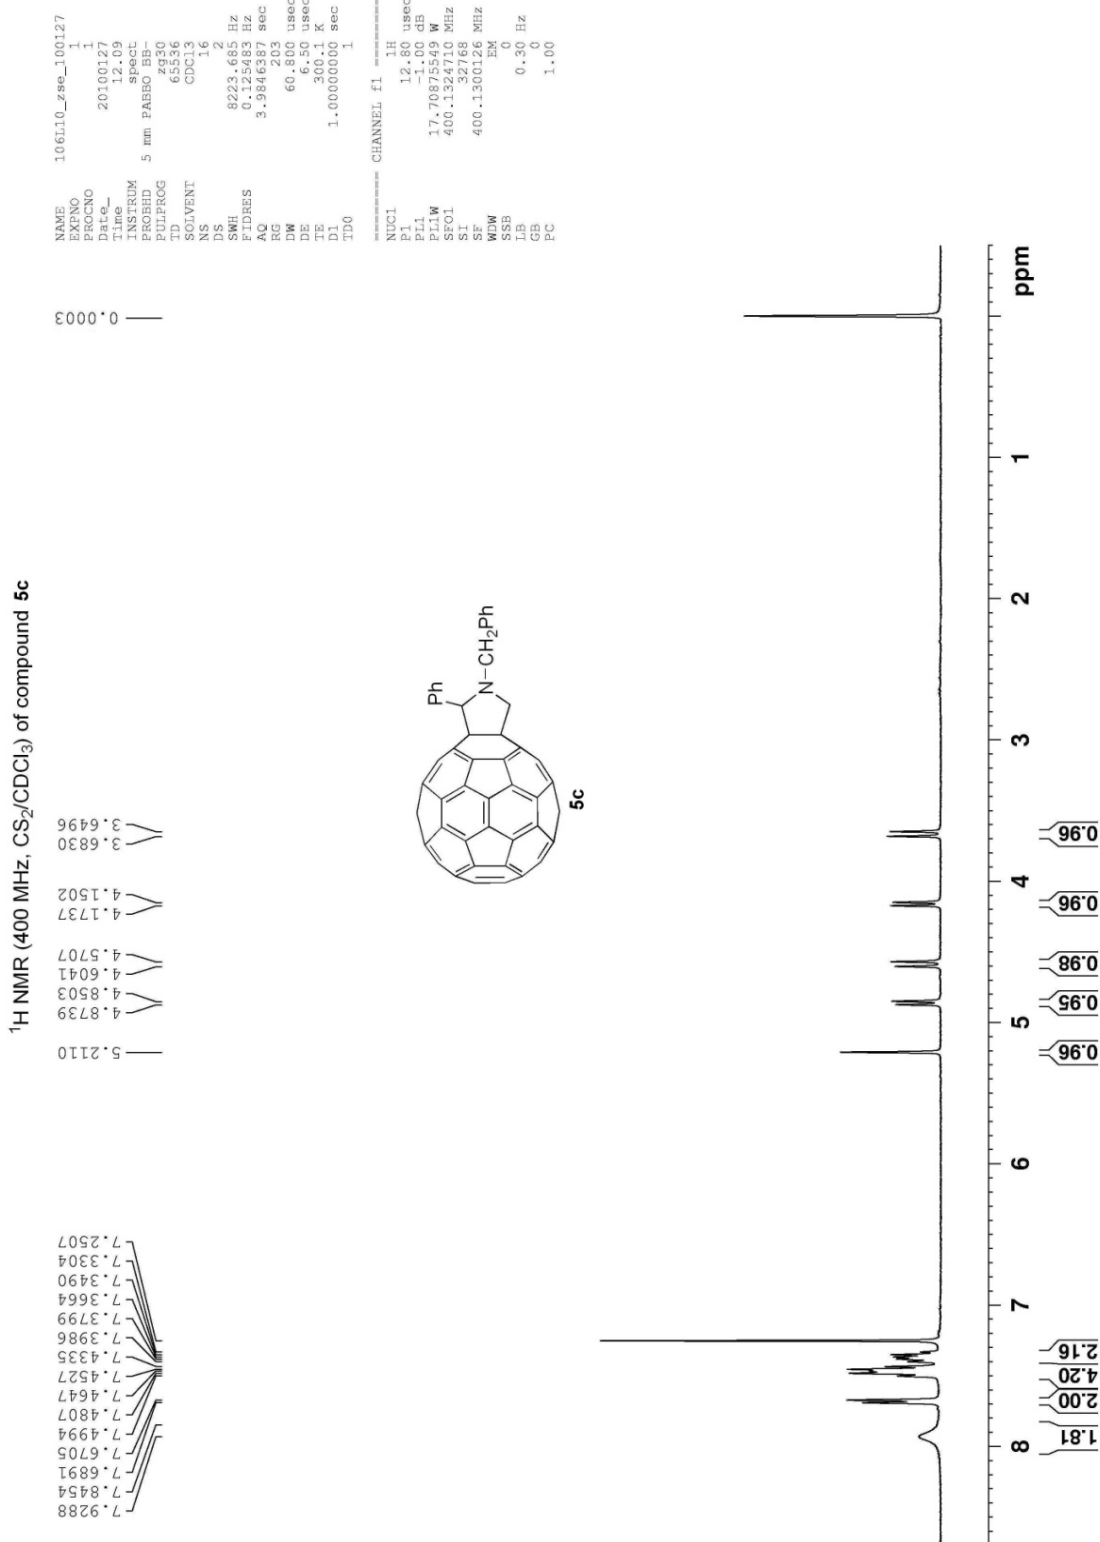

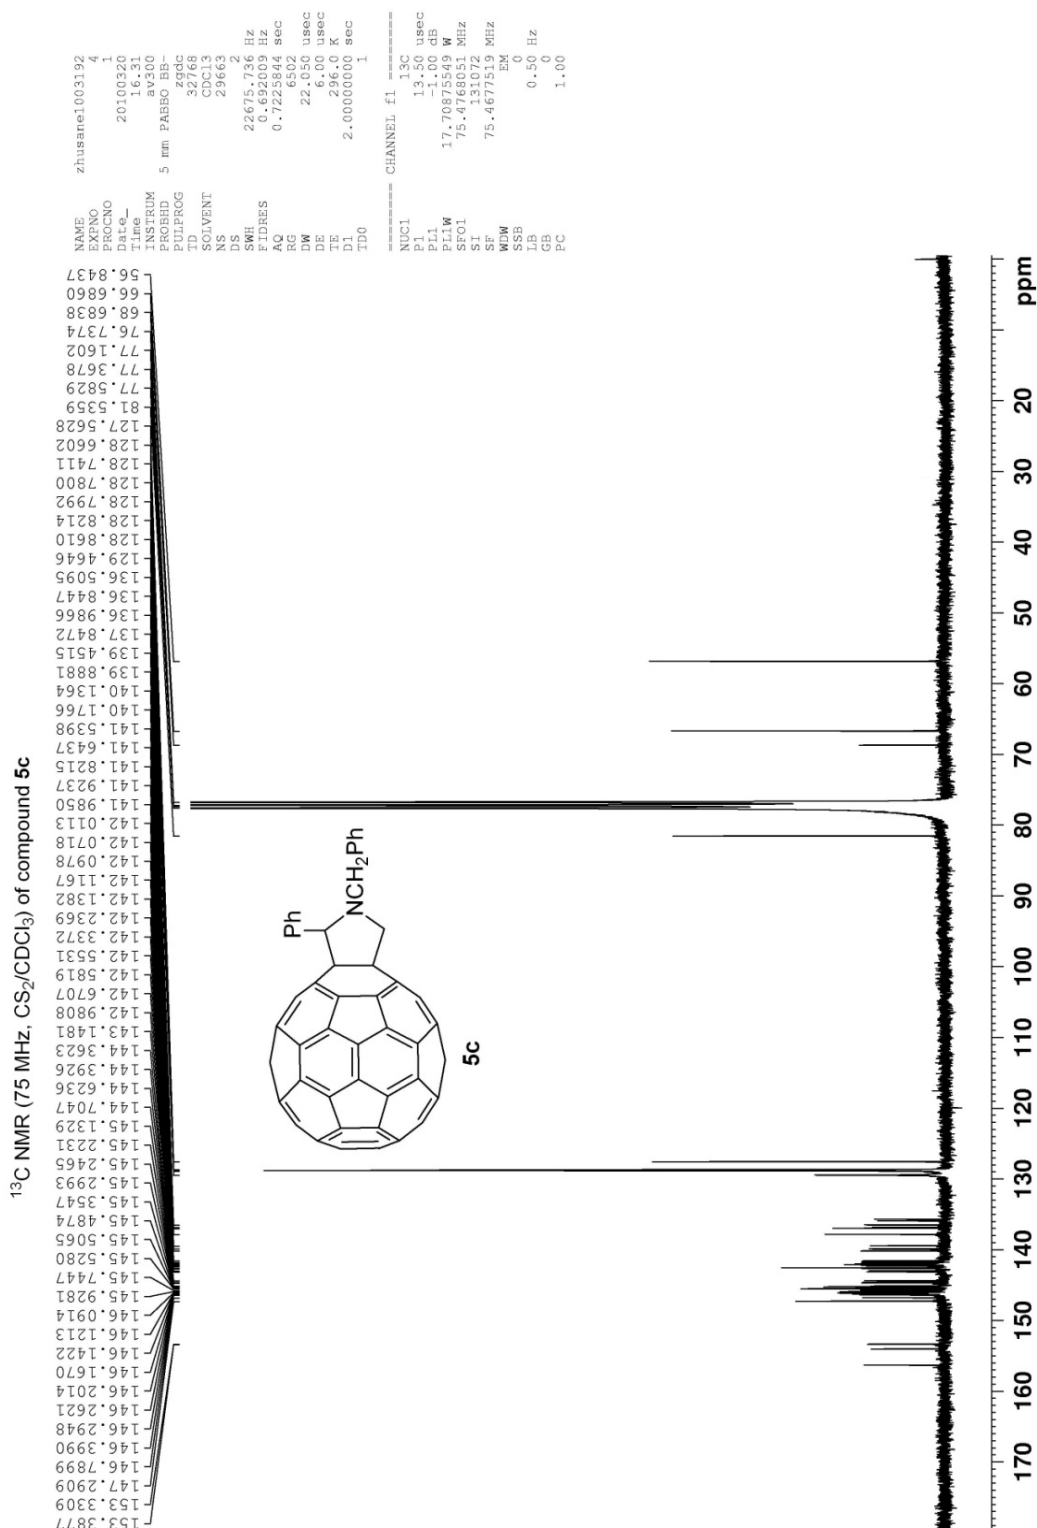

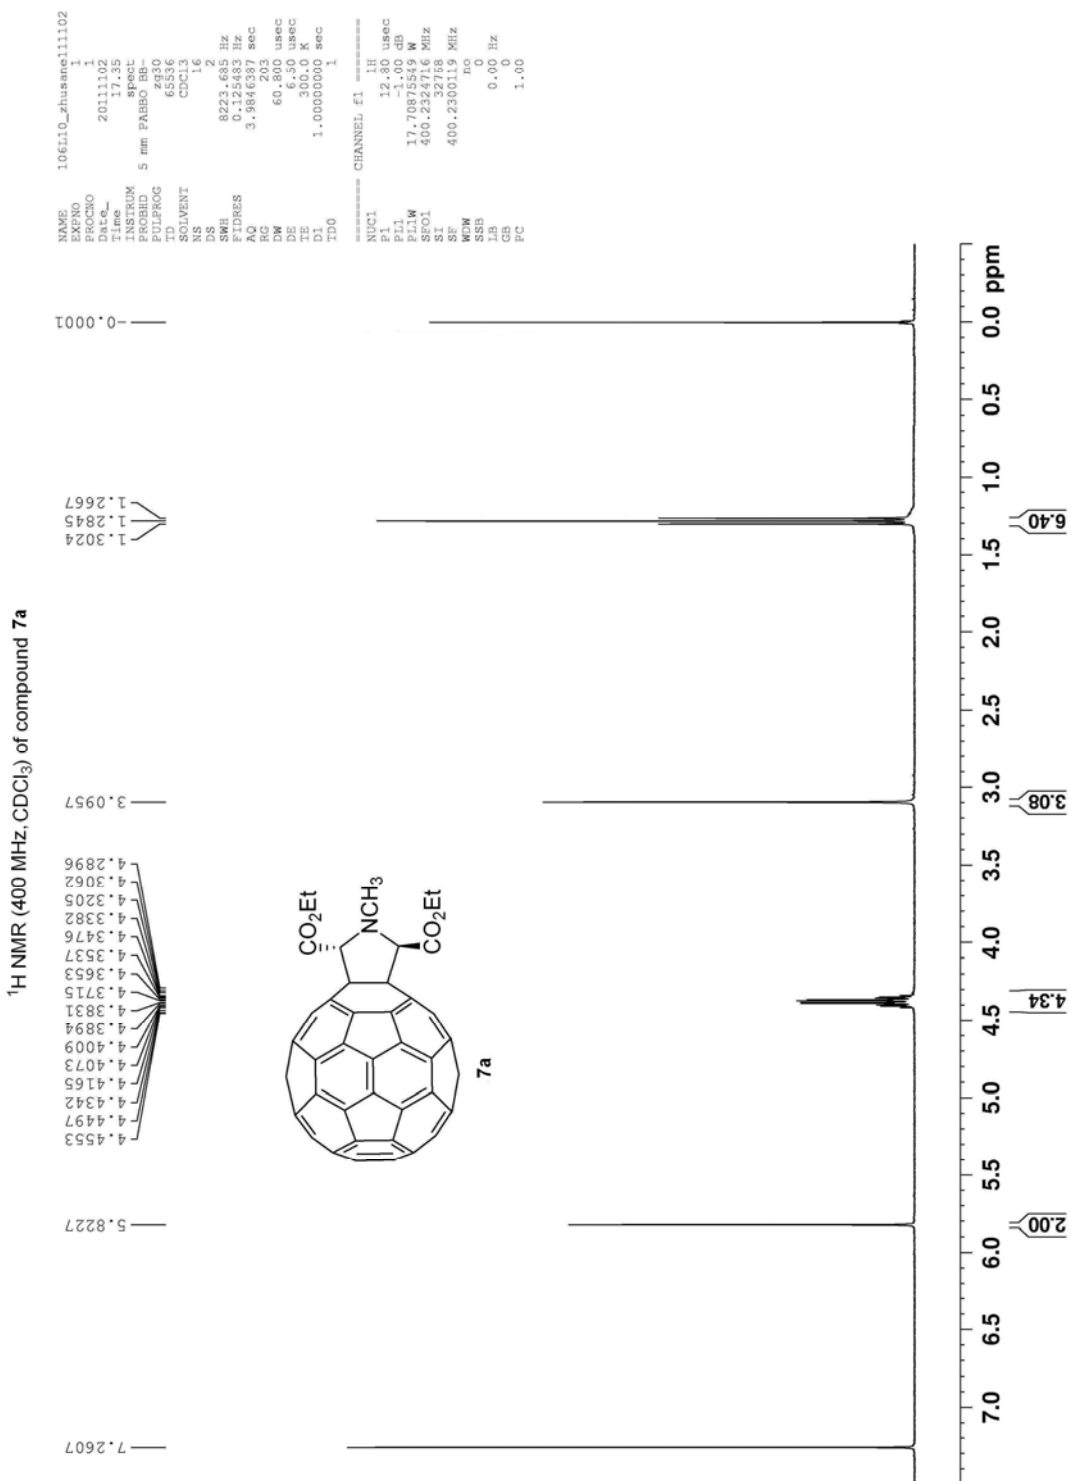



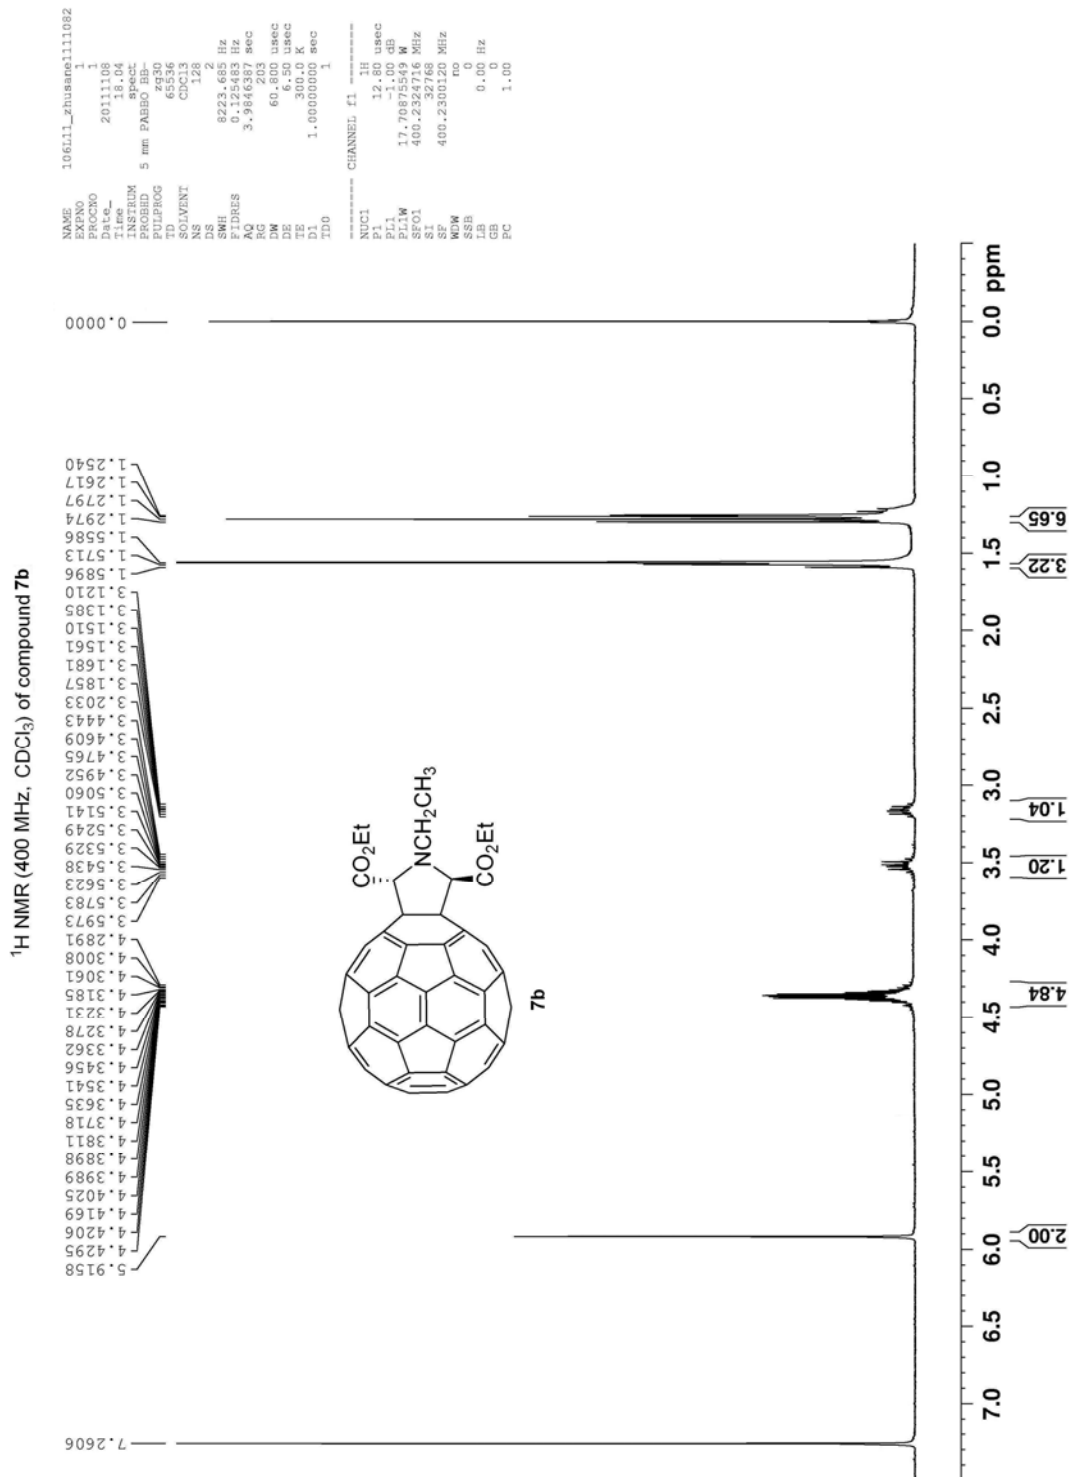

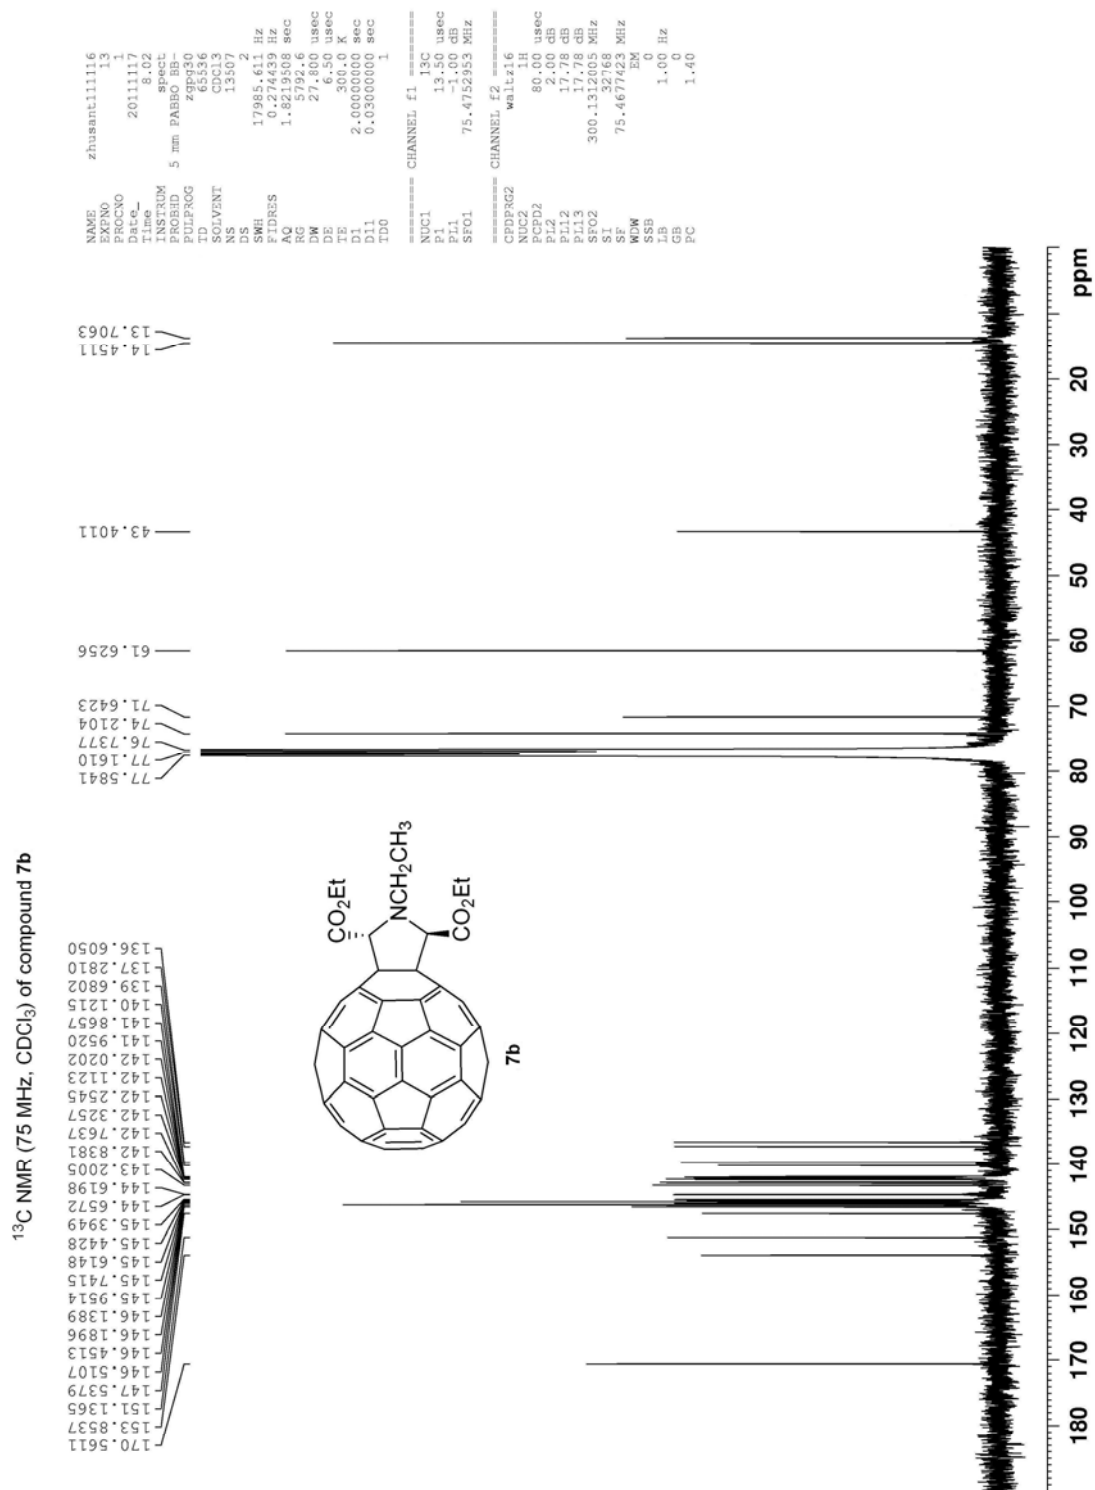

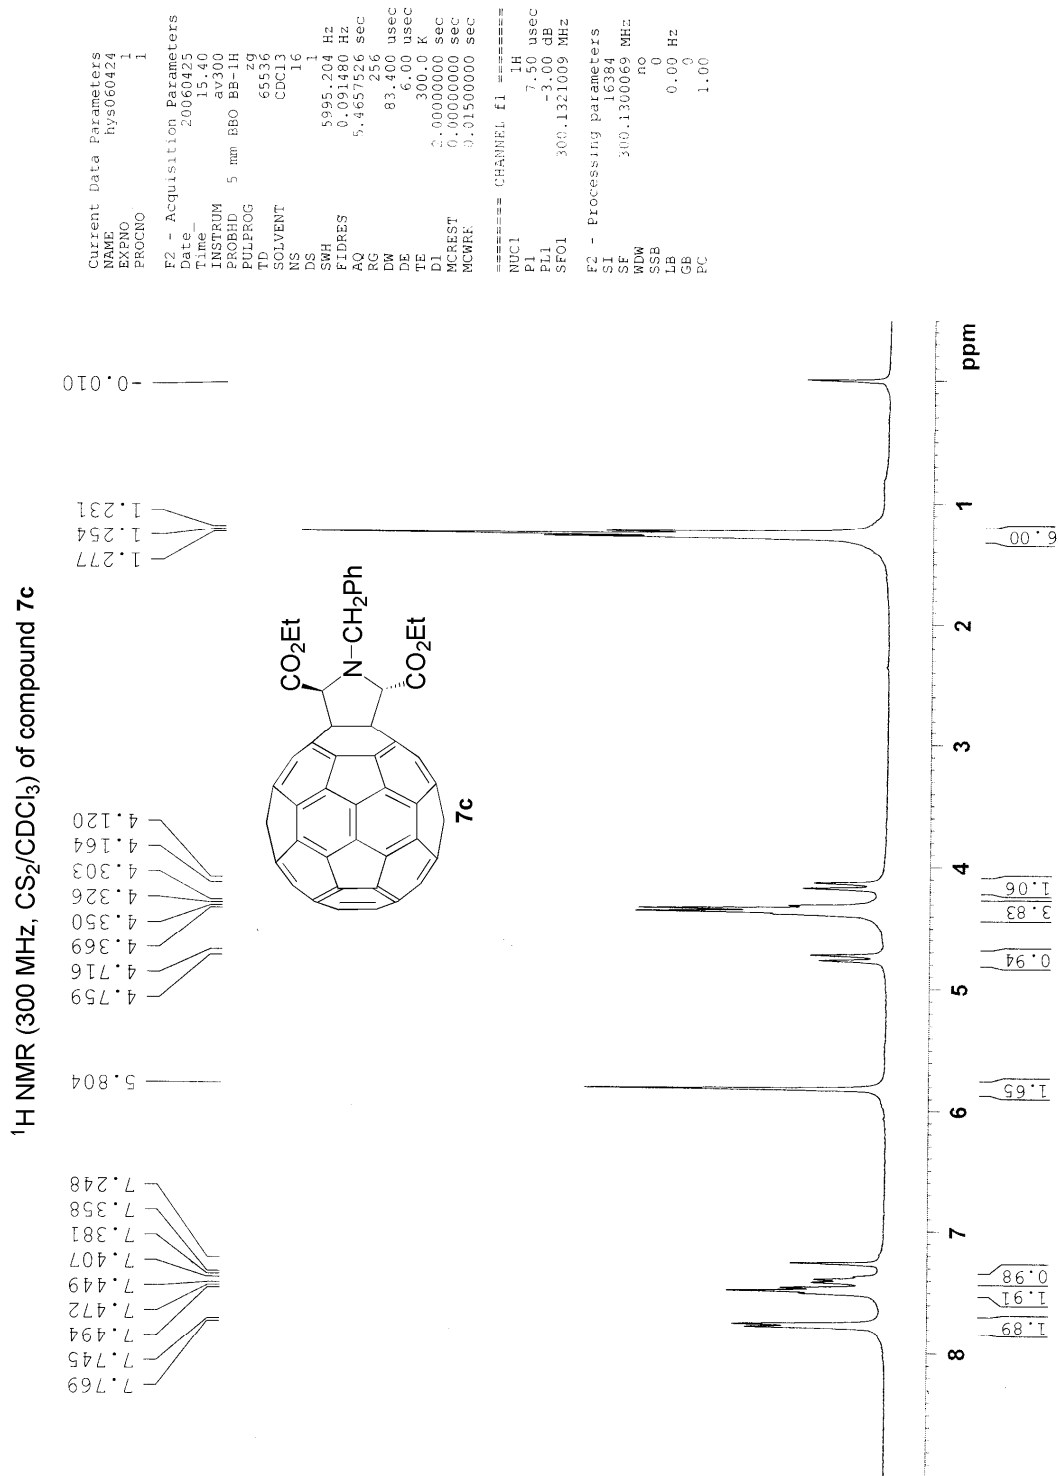

Electronic Supplementary Material (ESI) for Organic & Biomolecular Chemistry  
 This journal is © The Royal Society of Chemistry 2012

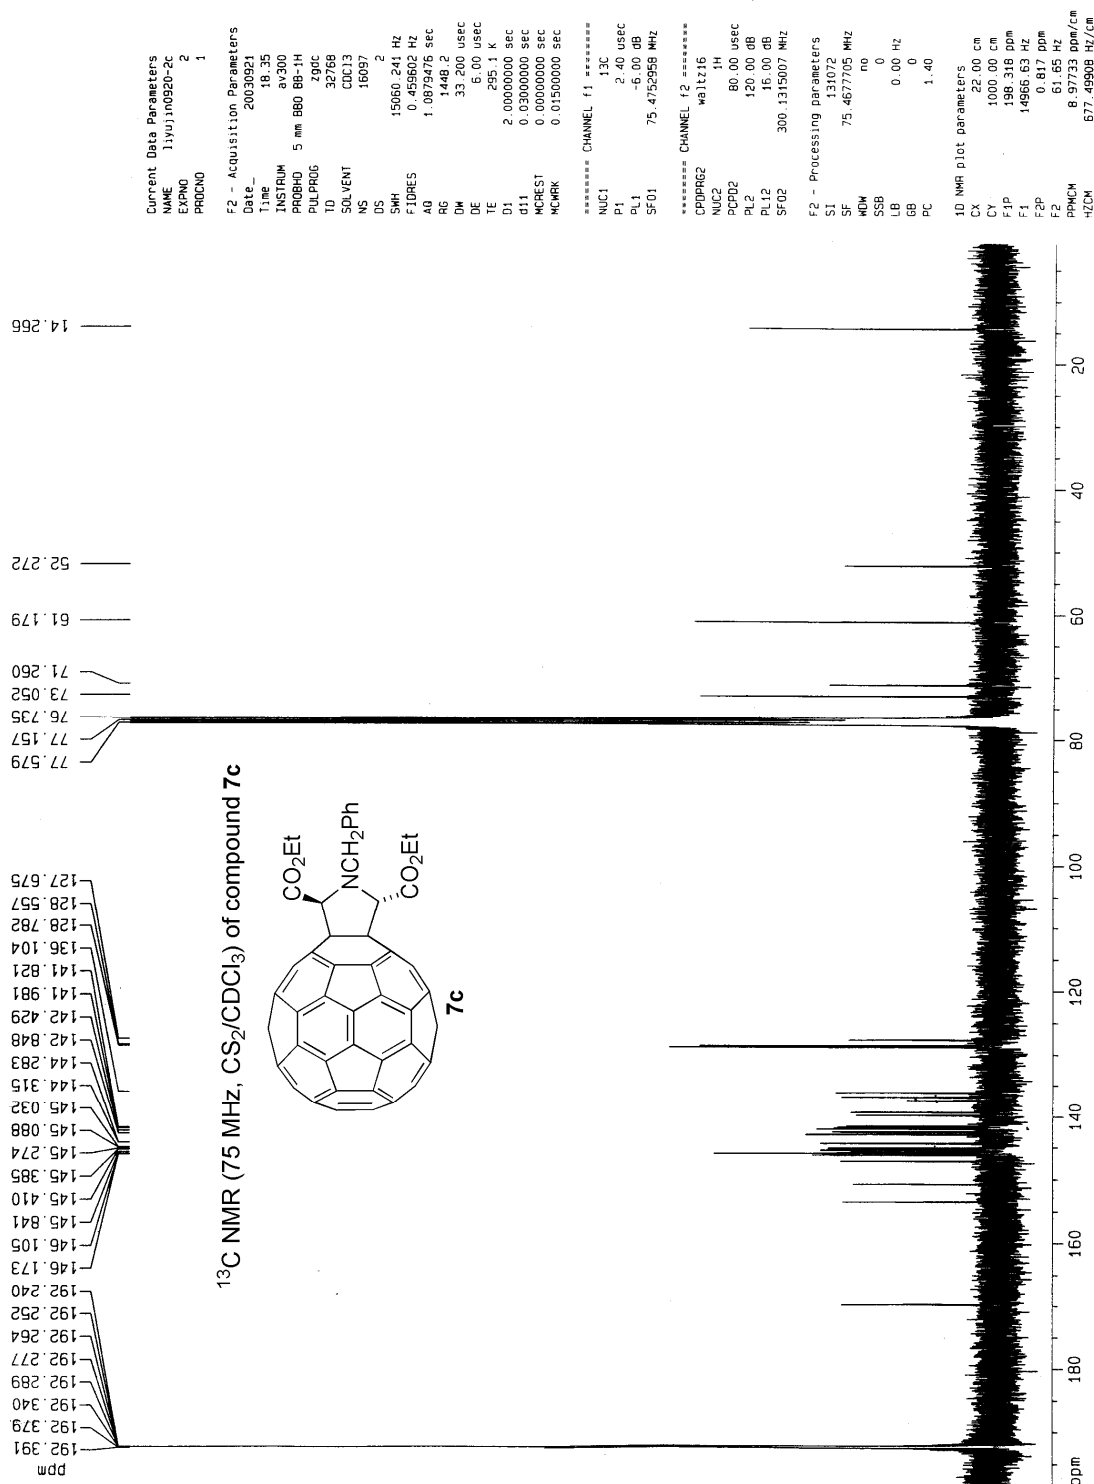

<sup>1</sup>H NMR (300 MHz, CS<sub>2</sub>(CDCl<sub>3</sub>) of compound 7d

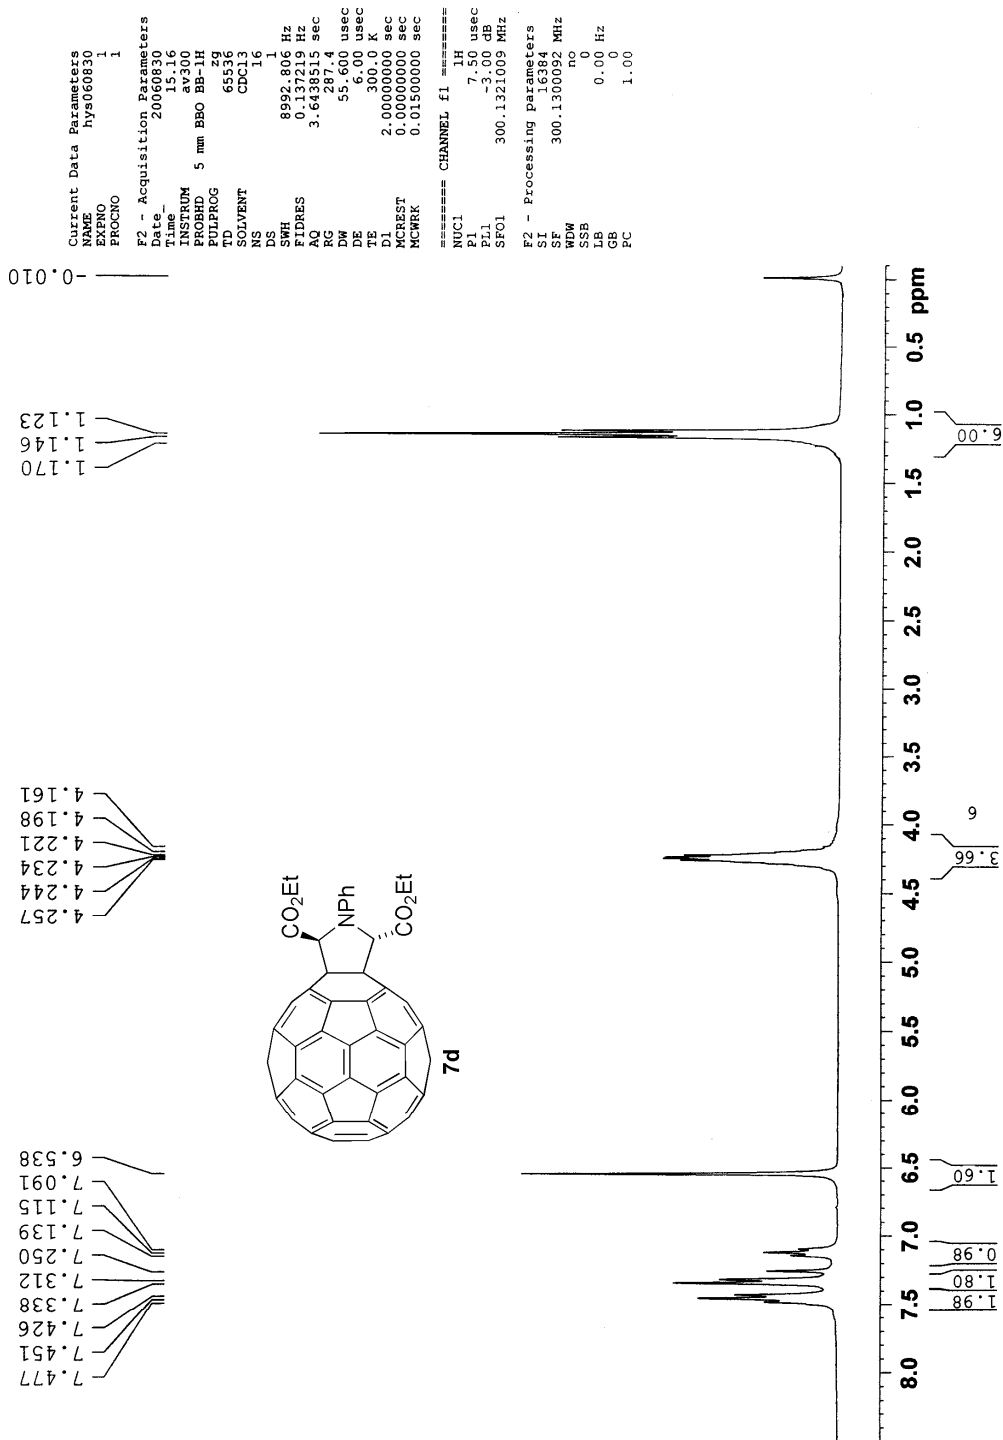

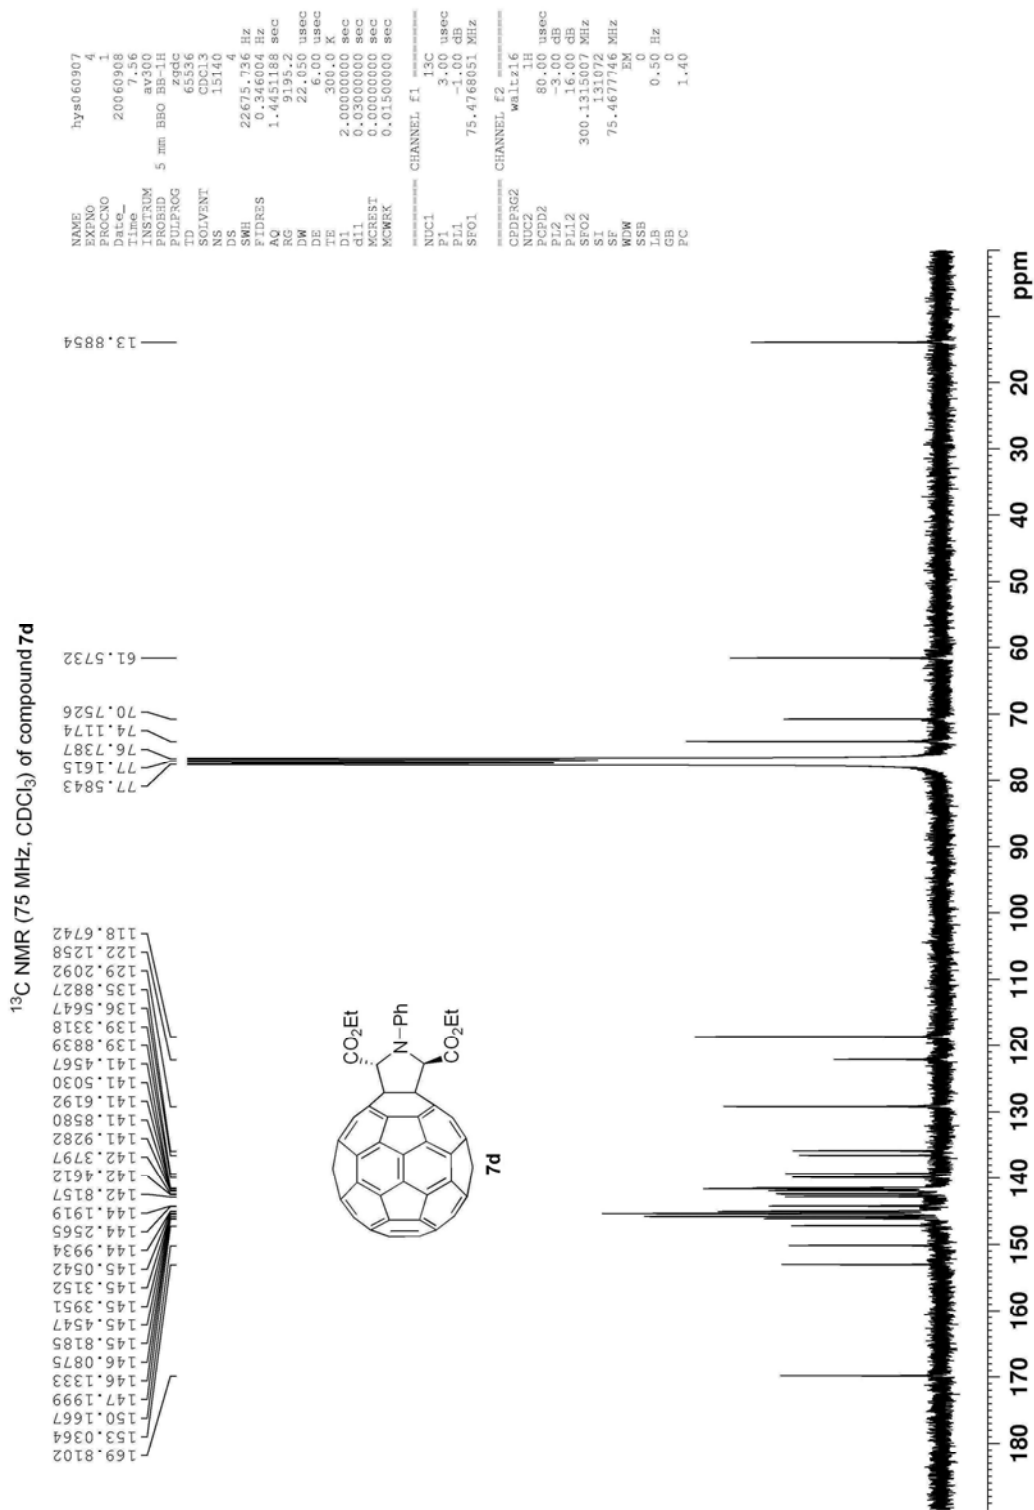

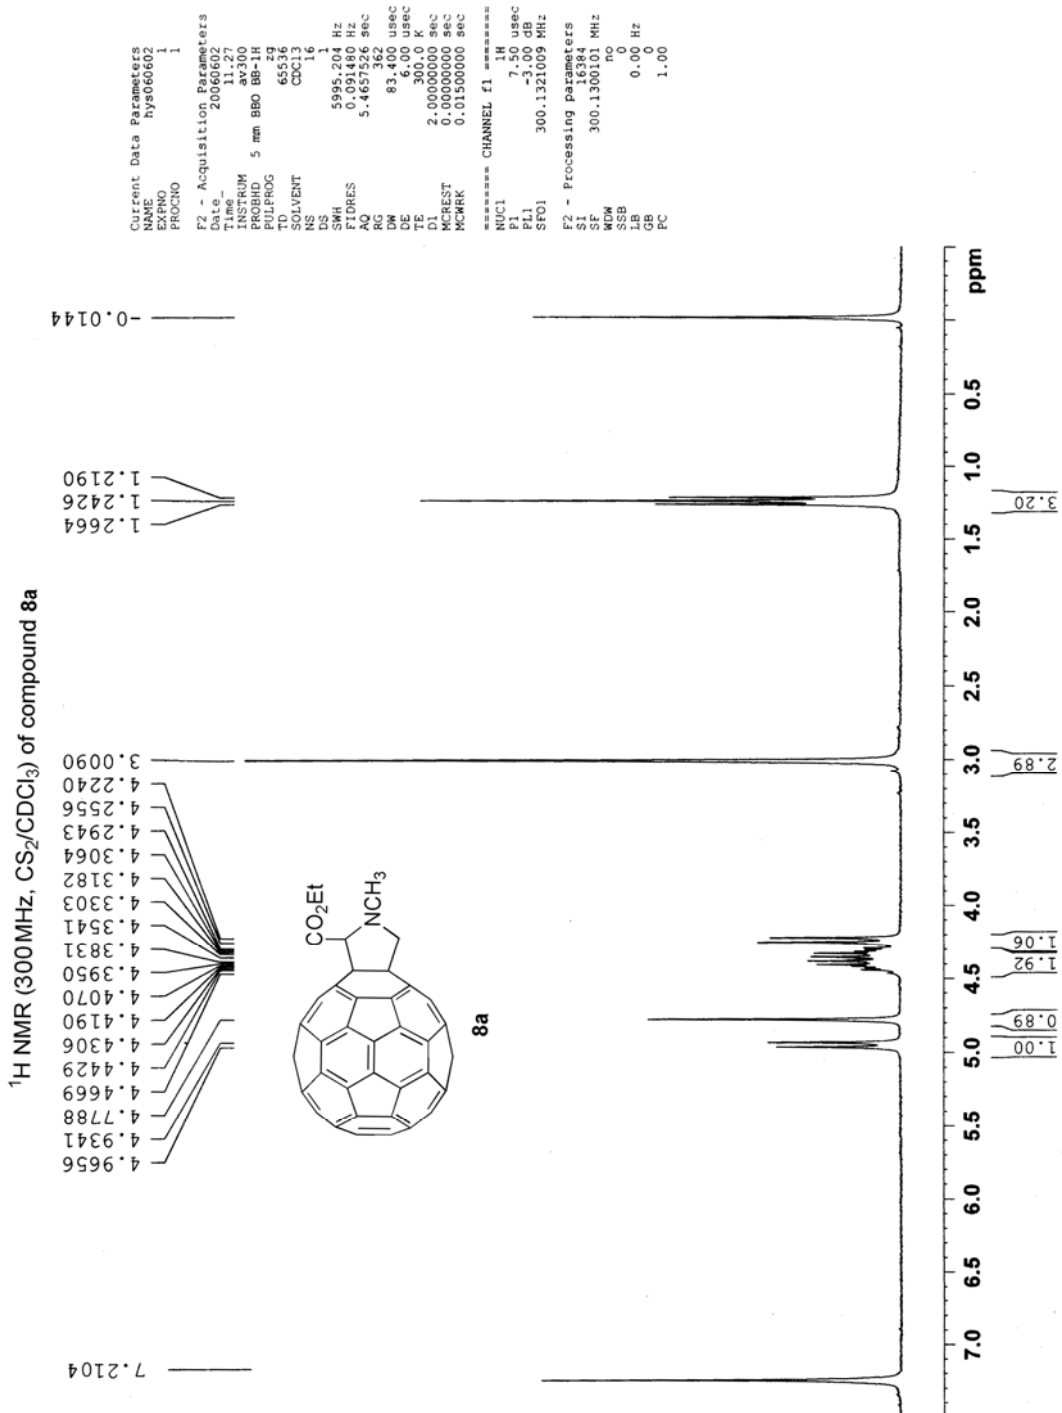

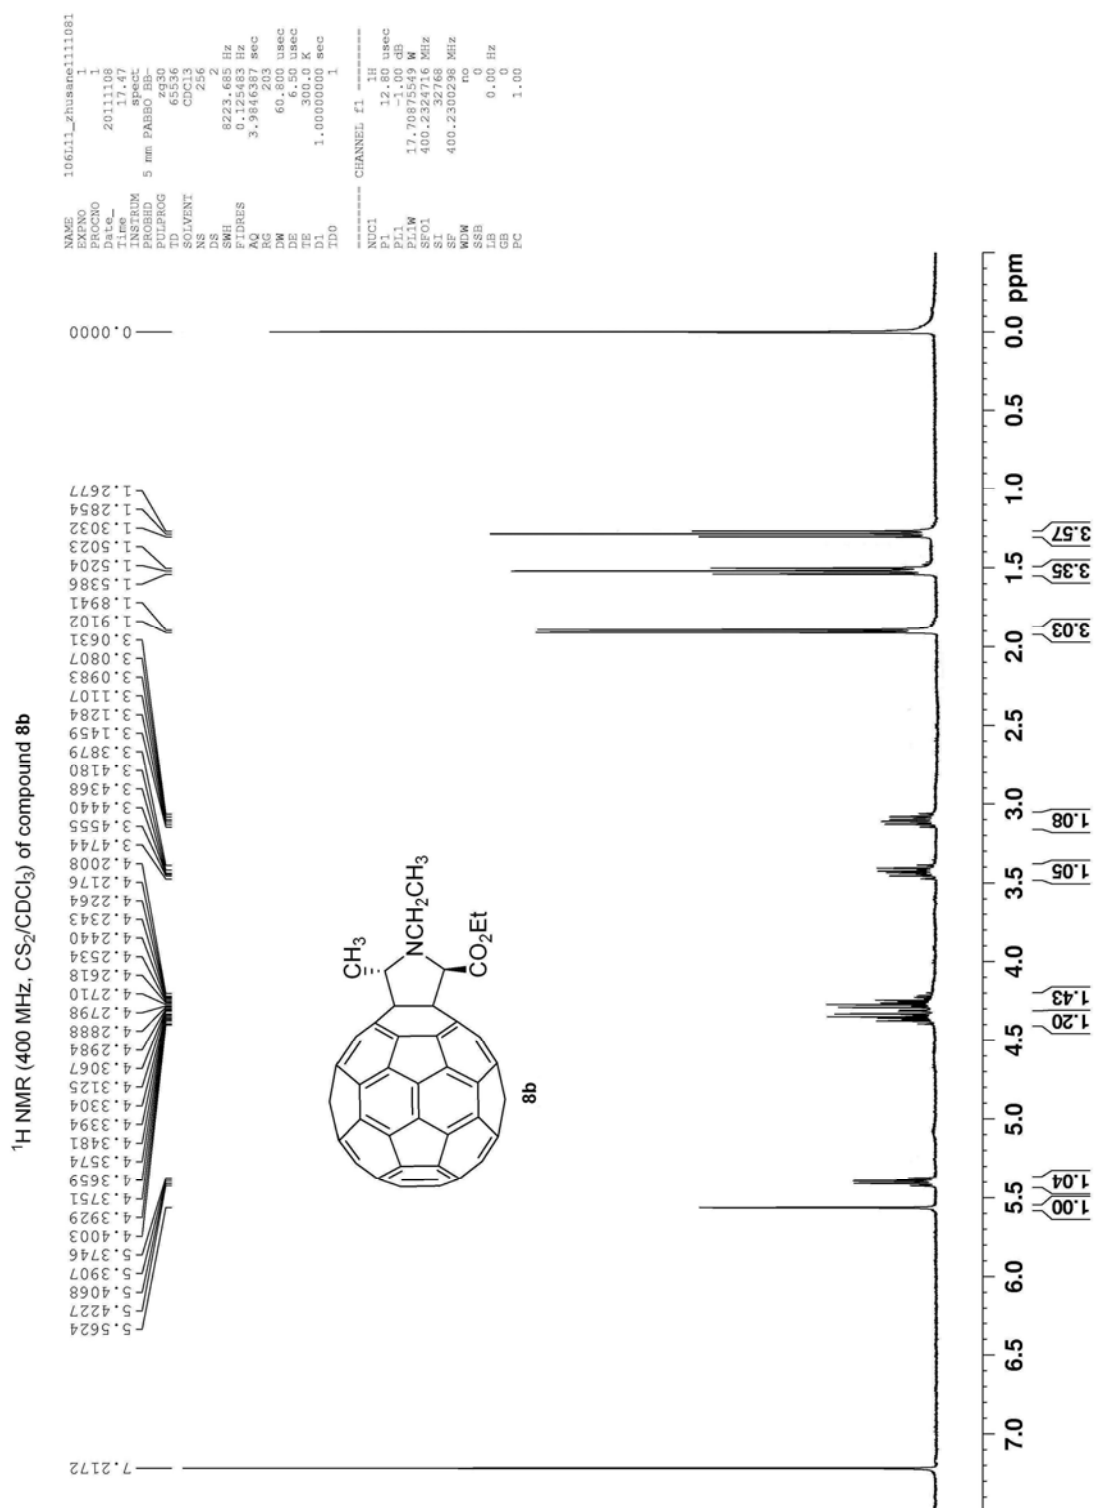



$^{13}\text{C}$  NMR (75 MHz,  $\text{CS}_2/\text{DMSO}-d_6$ ) of compound **8b**

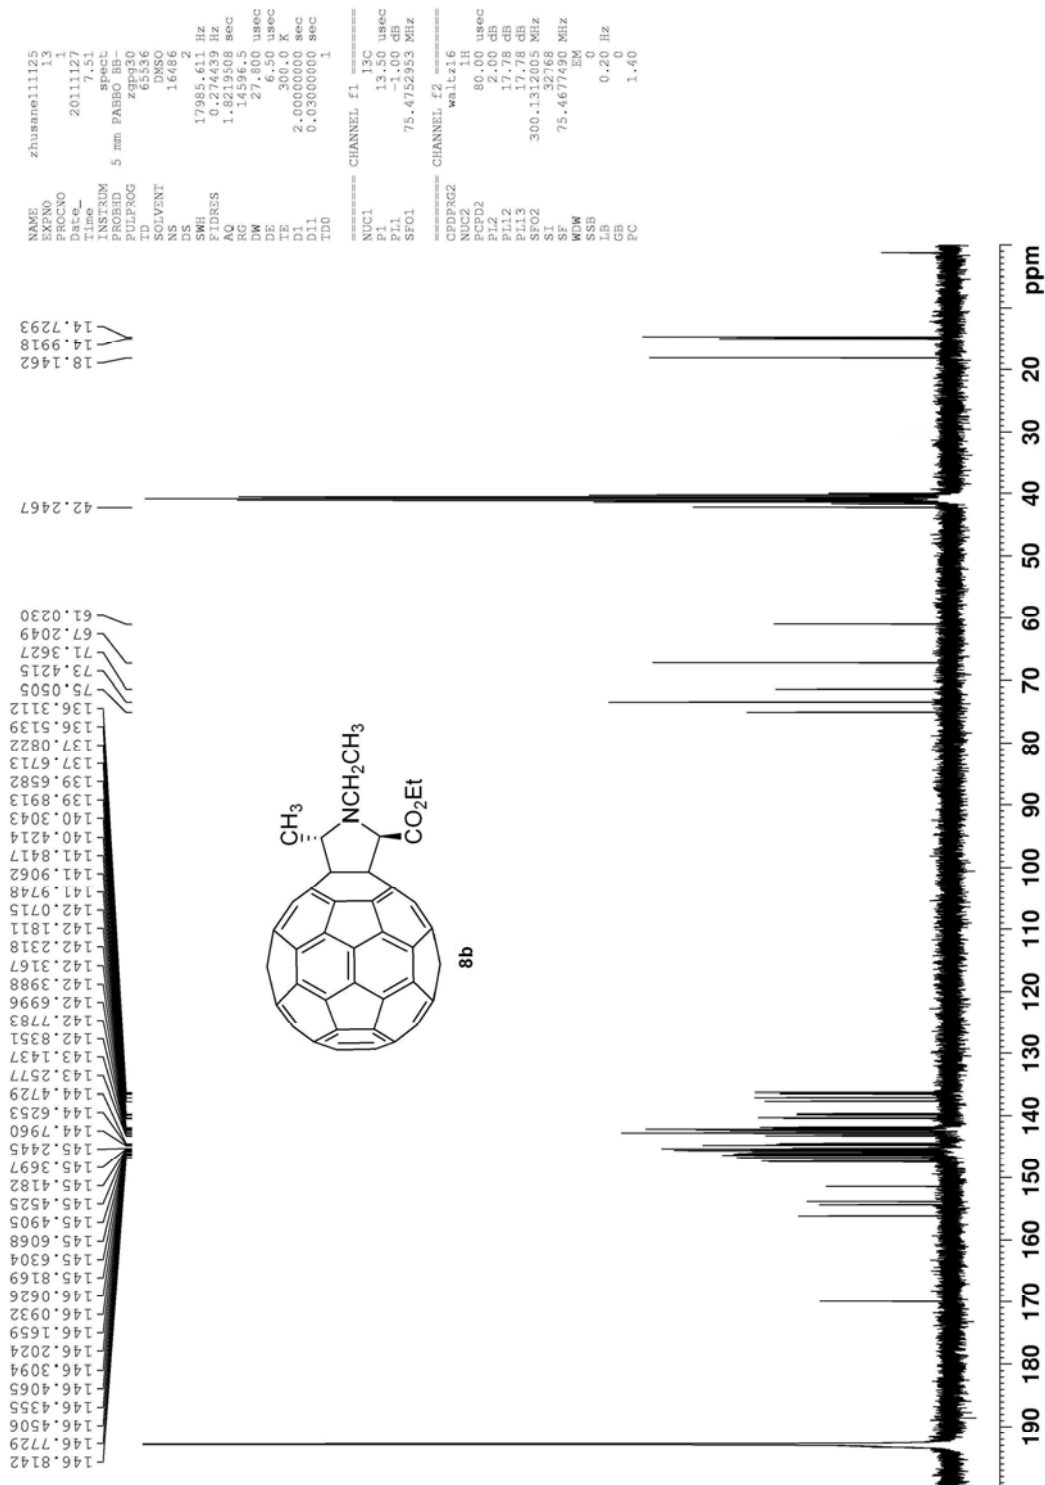

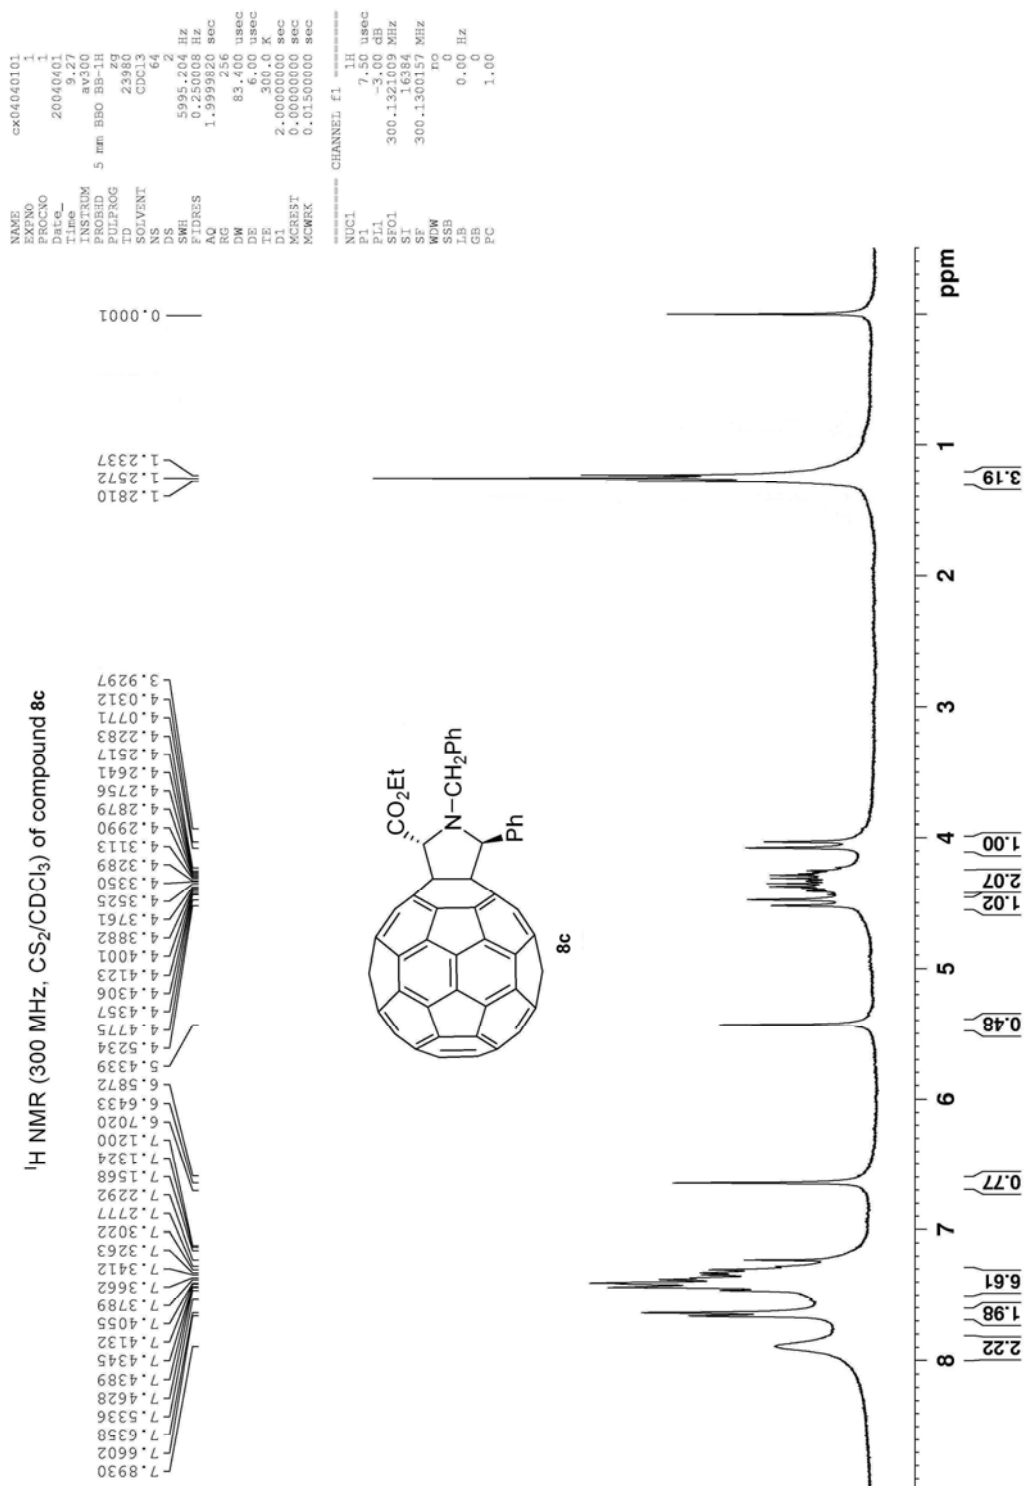

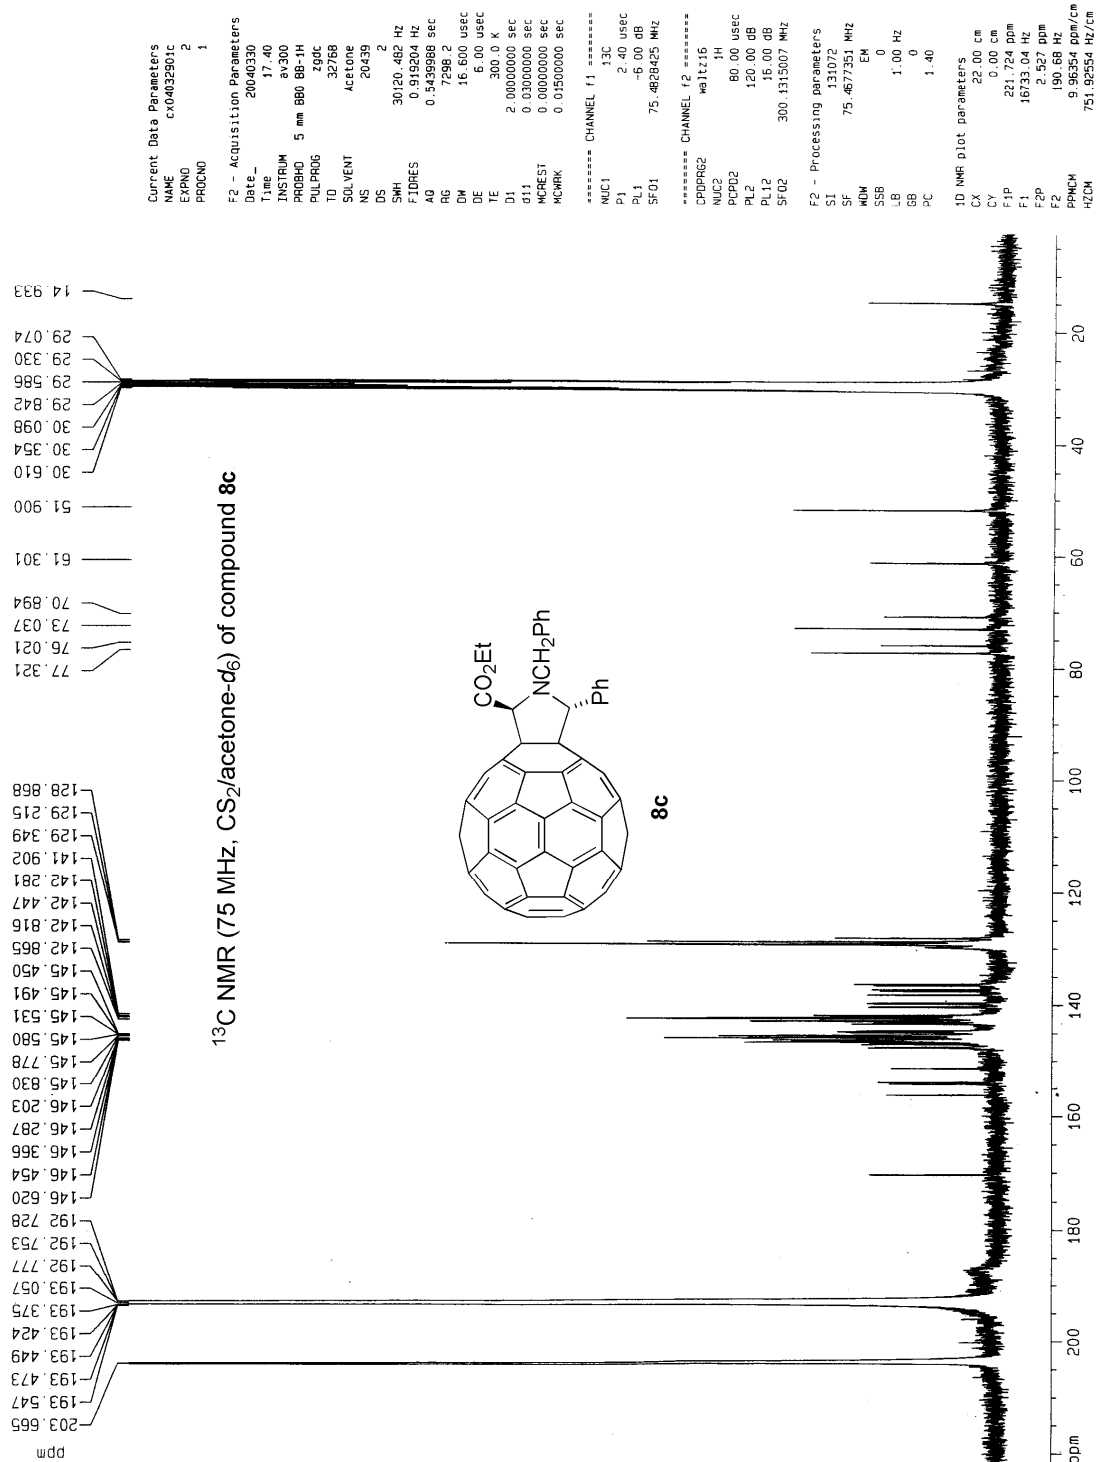

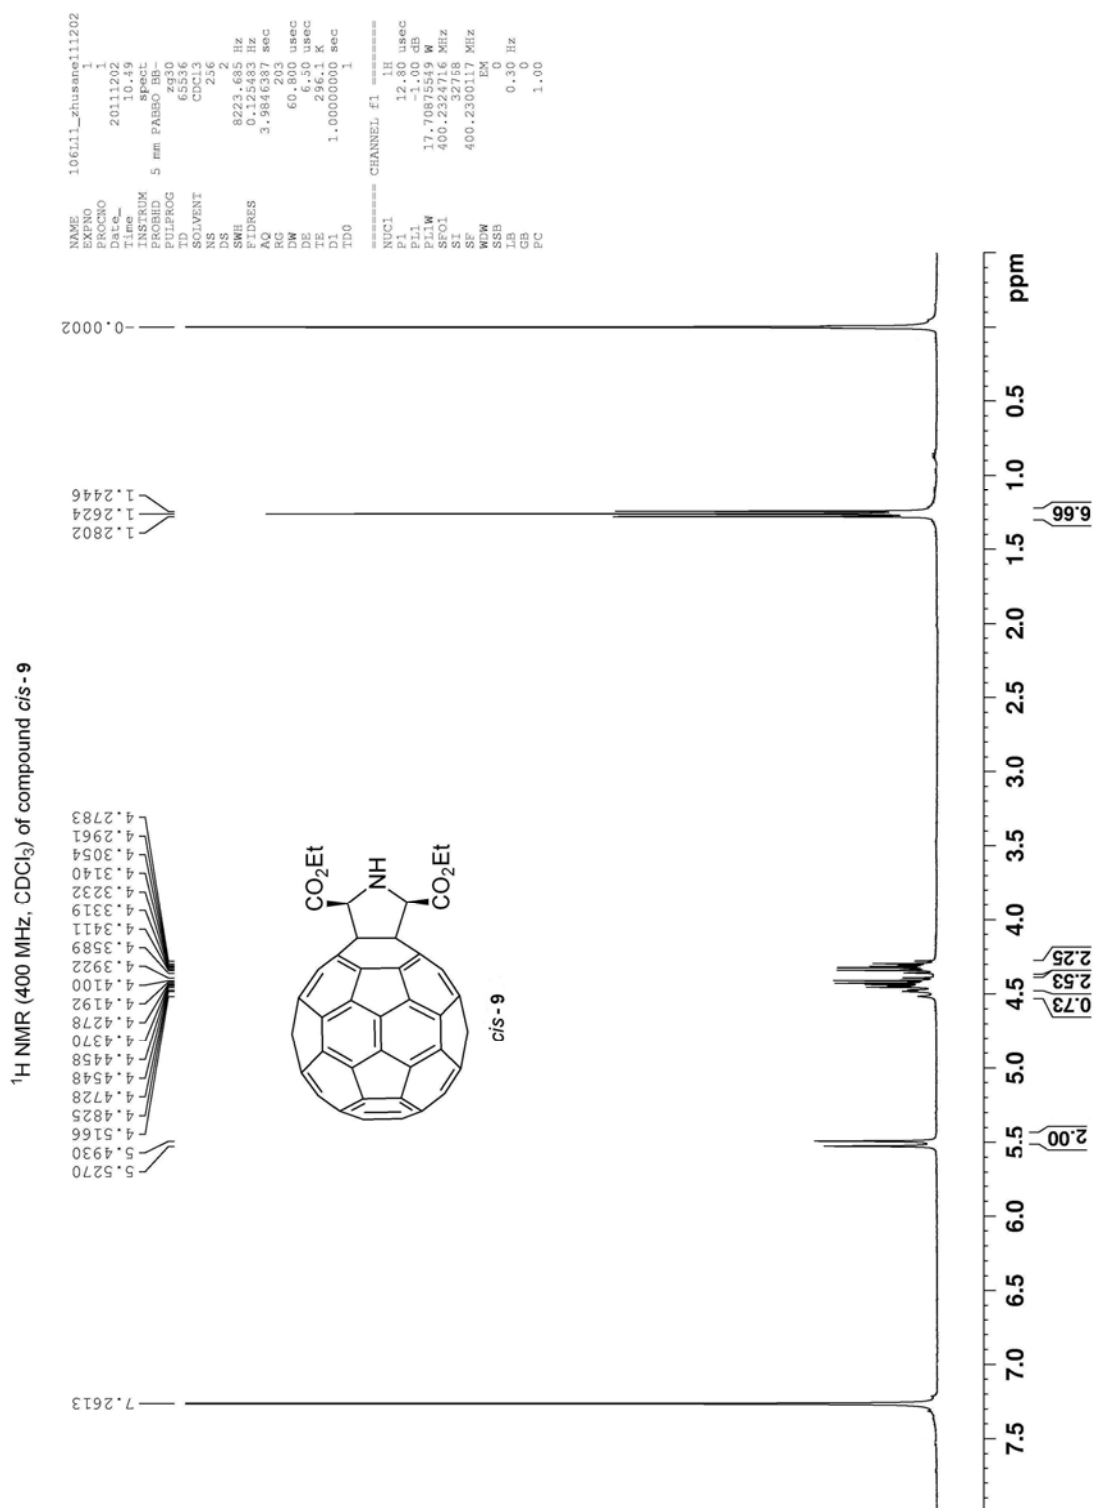

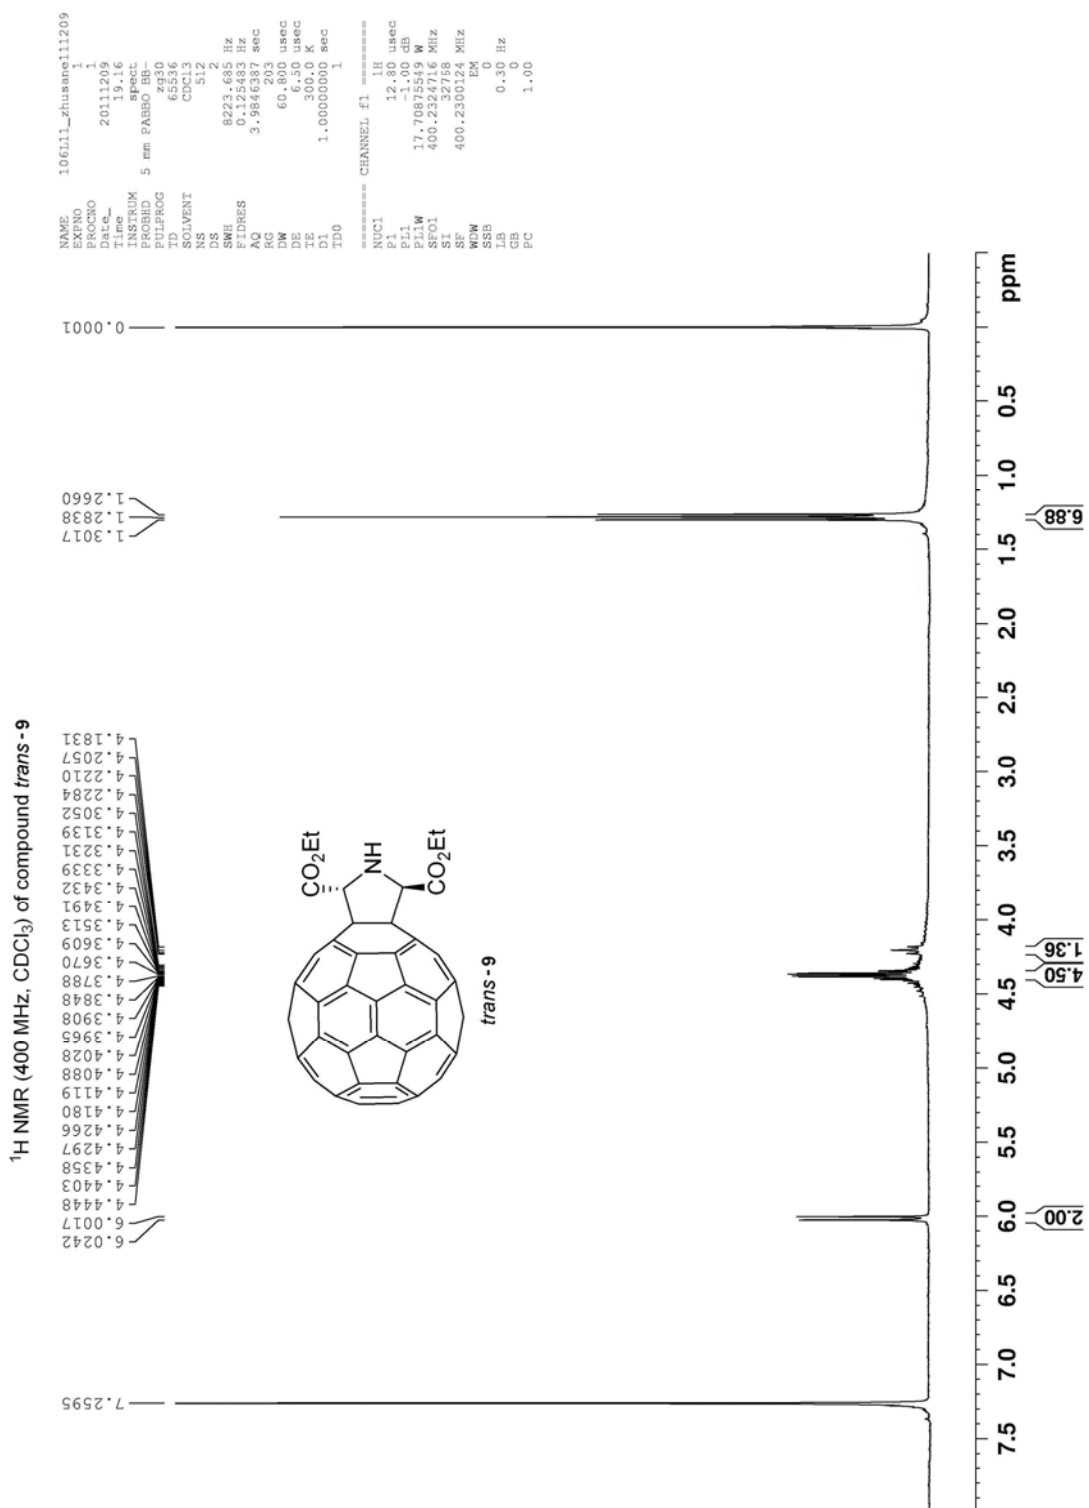

<sup>13</sup>C NMR (75 MHz, CS<sub>2</sub>/CDCl<sub>3</sub>) of compound *trans*-9

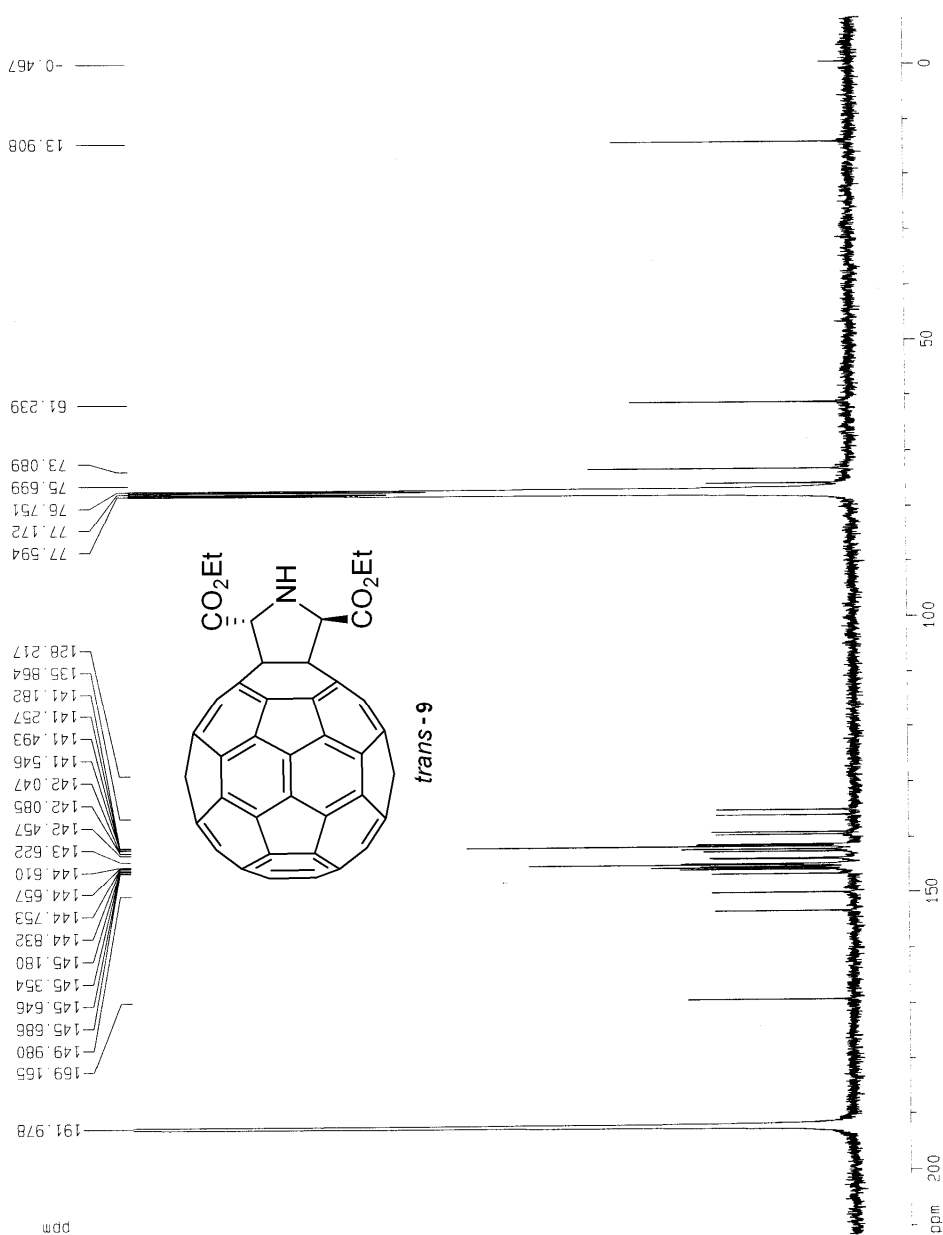

Current Data Parameters  
NAME tz900220t  
EXPNO 4  
PROCNO 1

F2 - Acquisition Parameters  
Date\_ 20090221  
Time 8.33  
INSTRUM av300  
PROBHD 5 mm PABBO BB-  
PULPROG zgpg  
TD 32768  
SOLVENT CDCl3  
NS 19101  
DS 2  
SWH 22675.736 Hz  
FIDRES 0.692009 Hz  
AQ 0.7225844 sec  
RG 1824.6  
DW 22.050 usec  
DE 6.00 usec  
TE 300.0 K  
D1 2.0000000 sec  
d11 0.0300000 sec  
ICREST 0.0000000 sec  
MCWK 0.0150000 sec

\*\*\*\*\* CHANNEL f1 \*\*\*\*\*  
NUC1 <sup>13</sup>C  
P1 3.50 usec  
PL1 -1.00 dB  
SF01 75.4768051 MHz

\*\*\*\*\* CHANNEL f2 \*\*\*\*\*  
CPOPRG2 waltz16  
NUC2 <sup>1</sup>H  
PCPD2 80.00 usec  
PL2 2.00 dB  
PL12 17.78 dB  
SF02 300.1315007 MHz

F2 - Processing parameters  
SI 131072  
SF 75.4678031 MHz  
WDW EM  
SSB 0  
LB 2.00 Hz  
GB 0  
PC 1.40

1D NMR plot parameters  
CX 22.00 cm  
CY 0.00 cm  
F1P 211.863 ppm  
F1 15973.74 Hz  
F2P -8.557 ppm  
F2 -645.74 Hz  
PPMCM 10.0098 ppm/cm  
HZCM 755.43109 Hz/cm
